# Supplementary material for: Photoisomerization mechanism of iminoguanidinium receptors from spectroscopic methods and quantum chemical calculations
Source: Royal Society of Chemistry journal article supplement (doi:10.1039/d4cp02747g), 2024-01-01
Supplement: d4cp02747g1.pdf [file d4cp02747g1.pdf]

## Supporting Information

### Photoisomerization Mechanism of Iminoguanidinium Receptors from Spectroscopic Methods and Quantum Chemical Calculations

Duy-Khoi Dang,<sup>1,§</sup> Jeffrey Einkauf,<sup>2,§</sup> Xinyou Ma,<sup>2</sup> Radu Custelcean,<sup>2</sup> Ying-Zhong Ma,<sup>2,\*</sup> Paul M. Zimmerman,<sup>1,\*</sup> Vyacheslav S. Bryantsev<sup>2,\*</sup>

<sup>1</sup>Department of Chemistry, University of Michigan, Ann Arbor, MI 48109, USA

<sup>2</sup>Chemical Sciences Division, Oak Ridge National Laboratory, Oak Ridge, TN, 37831-6119, USA

\*e-mail: [may1@ornl.gov](mailto:may1@ornl.gov), [paulzim@umich.edu](mailto:paulzim@umich.edu), [bryantsevv@ornl.gov](mailto:bryantsevv@ornl.gov)

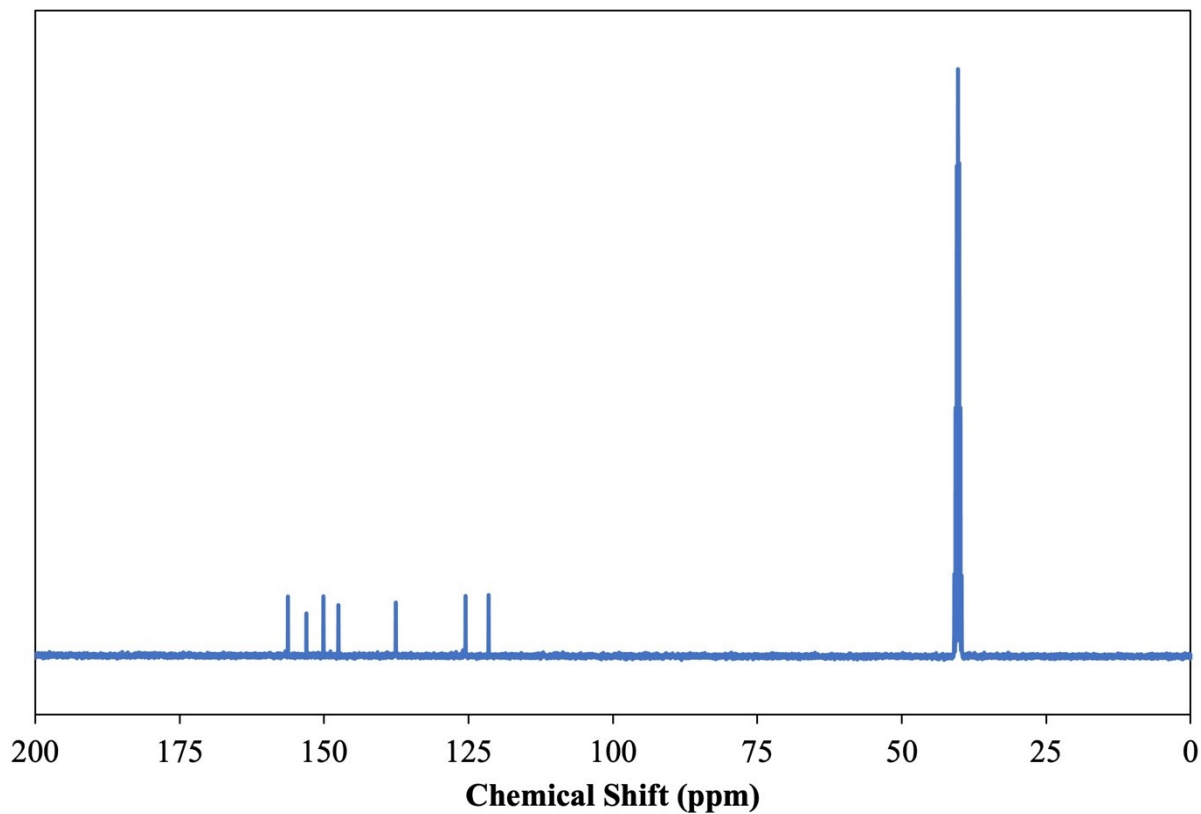

**Figure S1.** <sup>13</sup>C NMR (100 MHz) of 2PyMIG·HBr in DMSO-*d*<sub>6</sub>.

**Table S1.** Crystallographic information for 2PyMIG·HBr.

|                               | 2PyMIG·HBr                                       |
|-------------------------------|--------------------------------------------------|
| Formula                       | C <sub>7</sub> H <sub>10</sub> N <sub>5</sub> Br |
| FW                            | 244.11                                           |
| Crystal Class                 | Orthorhombic                                     |
| Space Group                   | <i>Pna</i> 2 <sub>1</sub>                        |
| a (Å)                         | 11.057                                           |
| b (Å)                         | 10.978                                           |
| c (Å)                         | 7.917                                            |
| α (deg)                       | 90                                               |
| β (deg)                       | 90                                               |
| γ (deg)                       | 90                                               |
| Z                             | 4                                                |
| Cell volume (Å <sup>3</sup> ) | 961.0                                            |
| Density (mg m <sup>-3</sup> ) | 1.687                                            |
| μ (mm <sup>-1</sup> )         | 4.239                                            |
| Temp (K)                      | 100                                              |
| Total Reflns                  | 34281                                            |

|                  |        |
|------------------|--------|
| $R_{\text{int}}$ | 0.0193 |
| $R_1^a$          | 0.0183 |
| $wR_2^a$         | 0.0427 |
| GOF              | 1.077  |

---


$$^aR_1 = \sum \frac{\|F_o| - |F_c|\|}{|F_o|}; wR_2 = \left( \frac{\sum [w(F_o^2 - F_c^2)^2]}{\sum [w(F_o^2)]} \right)^{1/2}$$


---

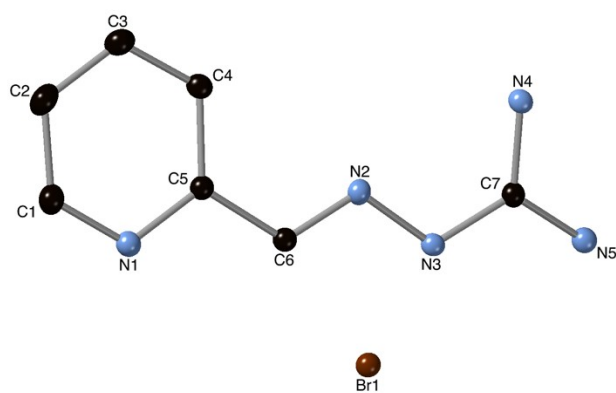

**Figure S2.** Thermal ellipsoid plot (50% probability level) of 2PyMIG·HBr. Hydrogen atoms have been omitted.

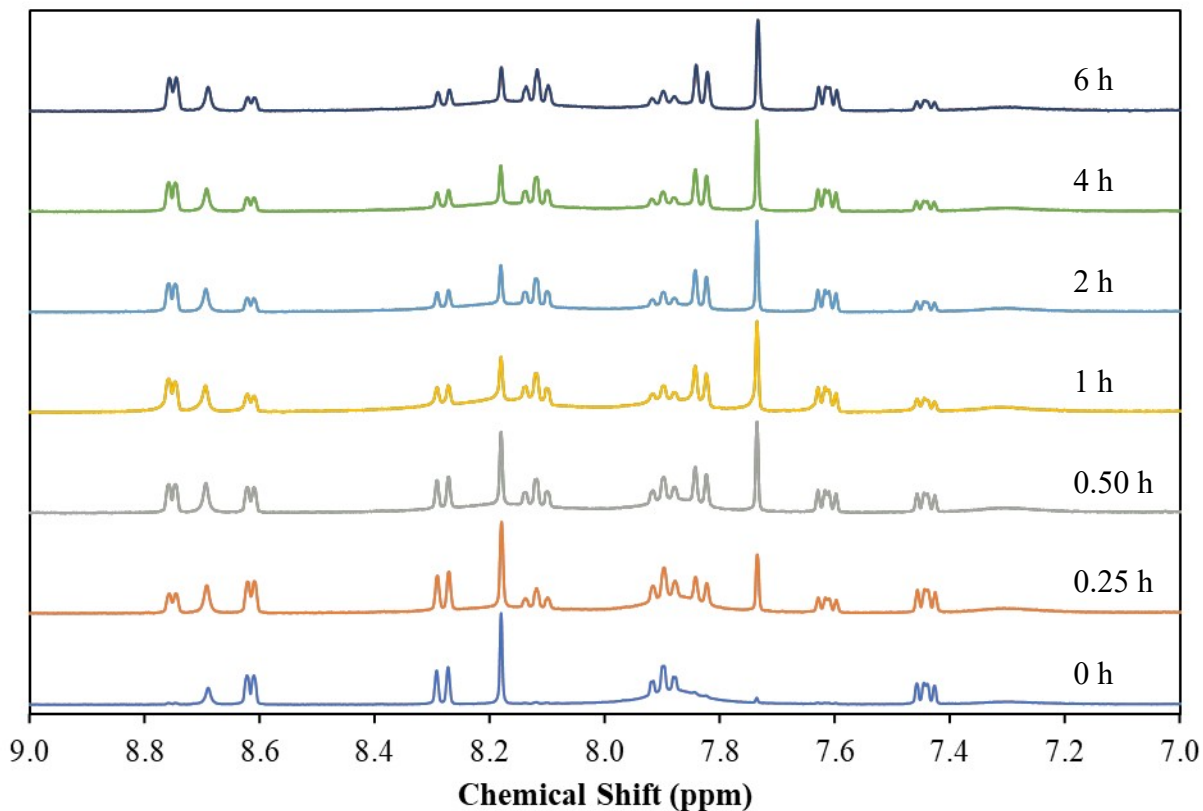

**Figure S3.**  $^1\text{H}$  NMR (400 MHz) of 9.81 mM 2PyMIG·HBr in  $\text{DMSO-}d_6$  during 6 h UV photoirradiation.

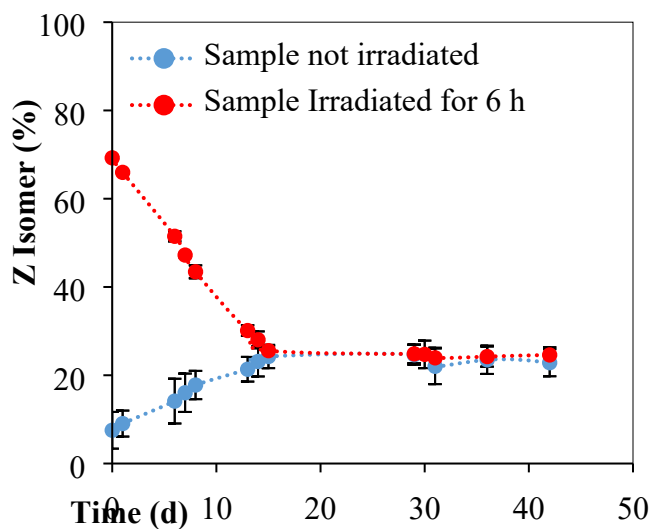

**Figure S4.** Thermal relaxation of 9.81 mM Z 2PyMIG·HCl in  $\text{DMSO-}d_6$  after UV irradiation (red) and the untreated *E* isomer at (blue) converging at a thermal equilibrium. Dotted lines are for visual aid.

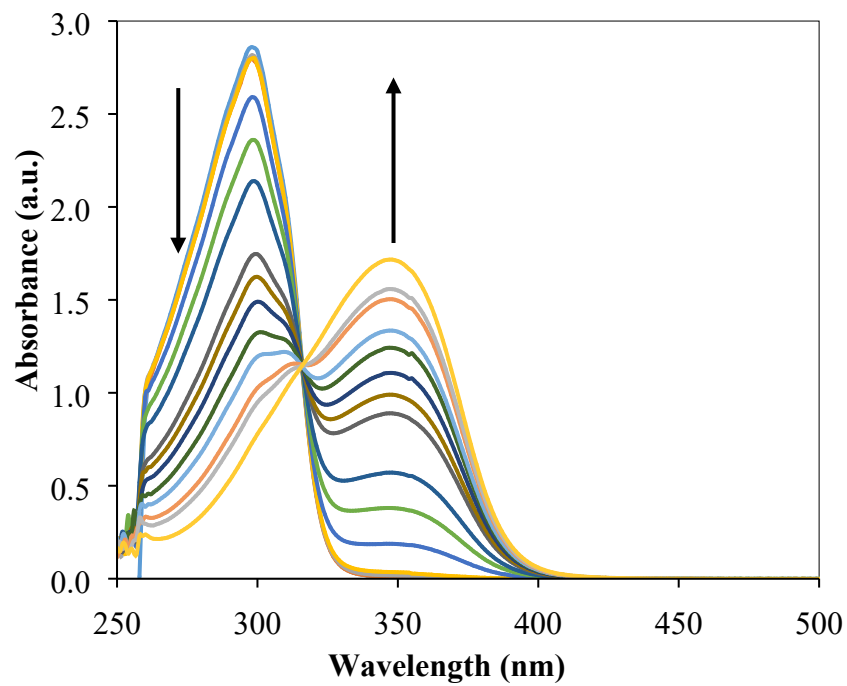

**Figure S5.** Titration of 2PyMIG·HBr with tetramethylammonium fluoride in DMSO. The protonated form decreases (303 nm) while the deprotonated form (352 nm) increases with the addition of the fluoride anion.

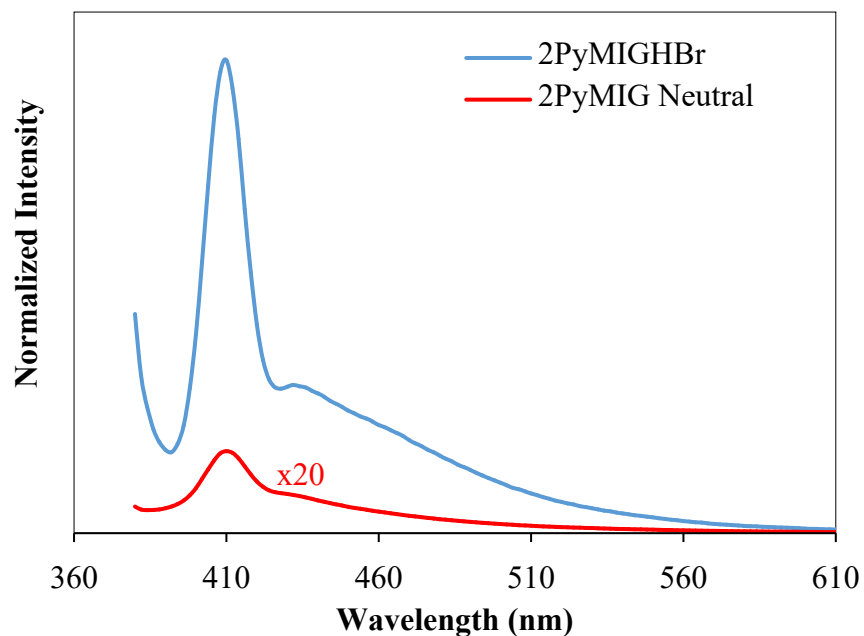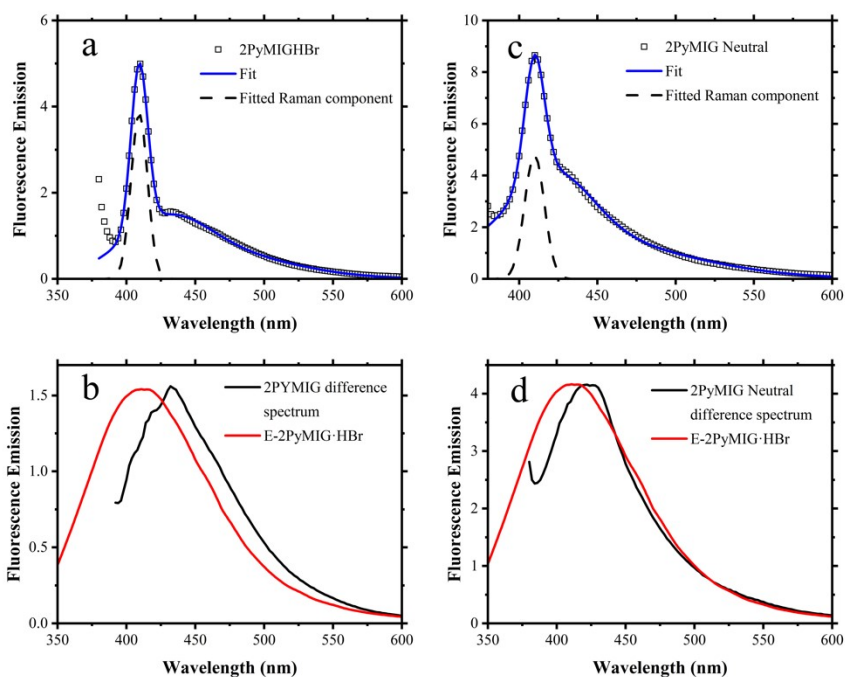

**Figure S6.** (Top) Emission spectra of 2PyMIG·HBr and 2PyMIG ( $\lambda_{exc} = 365$  nm) normalized to the absorption of each species (cation = 0.011792; neutral = 0.102527). The neutral 2PyMIG emission data has been increased by a factor of 20 for easier viewing. The emission at 410 nm are

Raman bands from the DMSO solvent. (Bottom) To compare these spectra with the one shown in Figure 8, we fitted these spectra using three Gaussians and the resulting overall fit and the Raman component for each spectrum are shown by blue solid line and dash line, respectively, in the panel a and c. Upon subtracting the Raman component from the corresponding measured emission spectrum, the difference spectrum appears resemble the emission spectrum of *E*-2PyMIG·HBr (Figure 8) reasonably well, especially for the neutral form, which can be readily seen from the panel b and d. To ease comparison, the *E*-2PyMIG·HBr spectrum (red lines) was scaled.

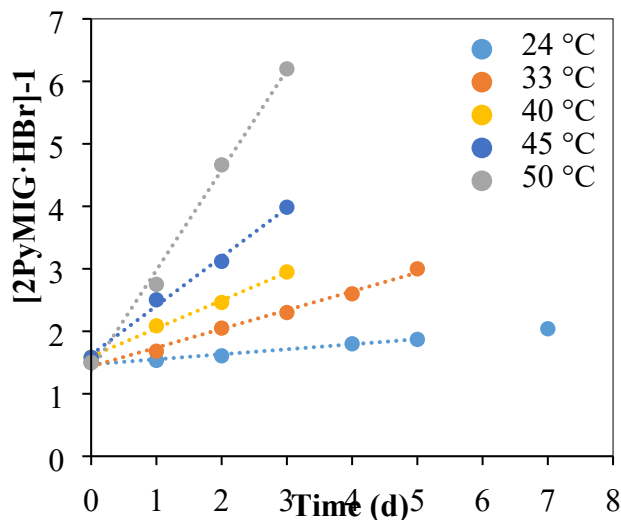

**Figure S7.** Second order thermal relaxation of 10 mM 2PyMIG·HBr  $Z \rightarrow E$  in DMSO- $d_6$  at 24 (blue), 33 (orange), 40 (yellow), 45 (light blue), and 50 °C (gray).

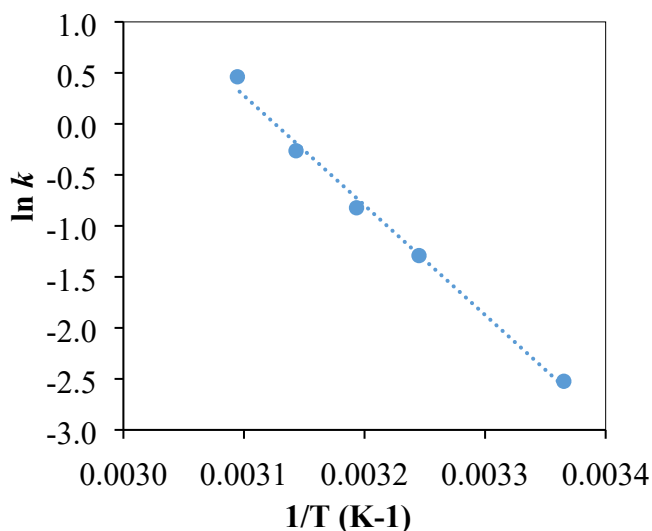

**Figure S8.** Arrhenius plot of the thermal isomerization of 2PyMIG·HBr  $Z \rightarrow E$  in DMSO- $d_6$ .

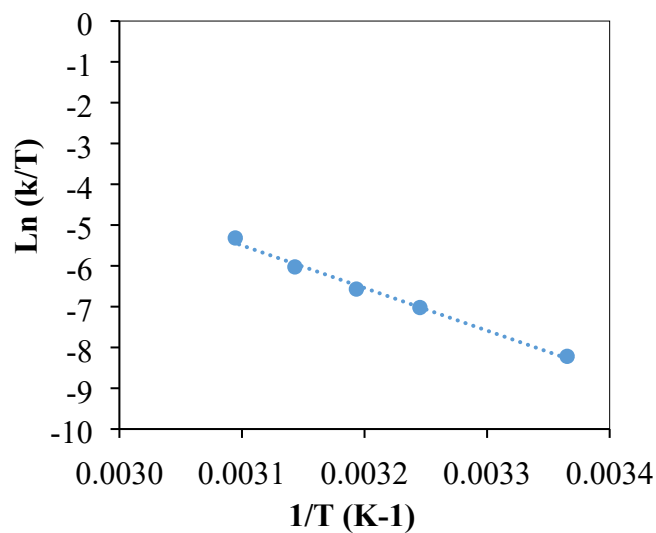

**Figure S9.** Eyring plot of the thermal isomerization of 2PyMIG·HBr Z → E in DMSO-*d*<sub>6</sub>.

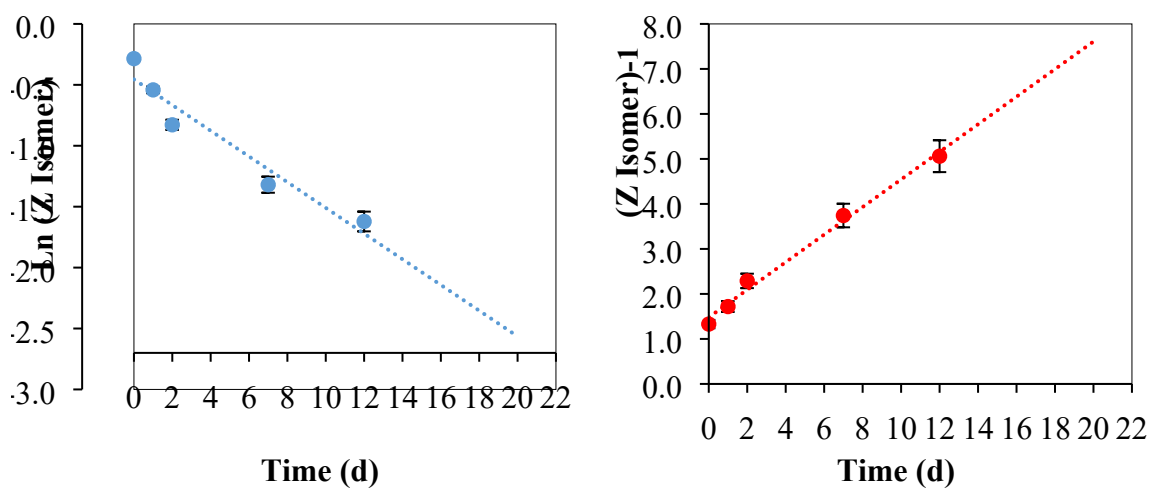

**Figure S10.** First (left) and second (right) order relaxation of Z-2PyMIG·HBr after photoirradiation at 24 °C



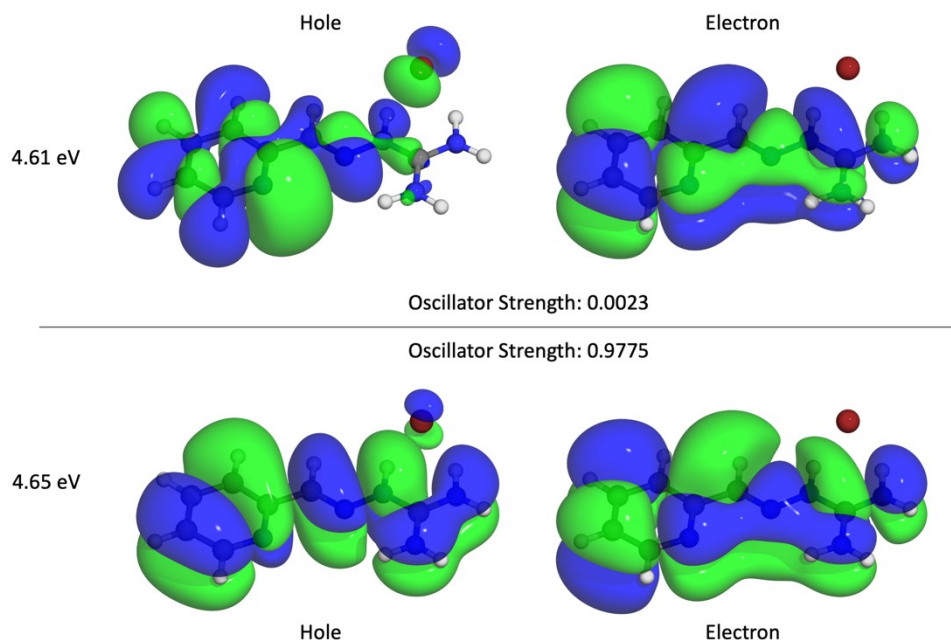

**Figure S11.** Natural transition orbitals (NTOs) (isovalue=0.02 a.u.) of the  $E_1$  geometry for the first two excited states computed at the TD- $\omega$ B97XD/def2-TZVPP (PCM=DMSO) level of theory.

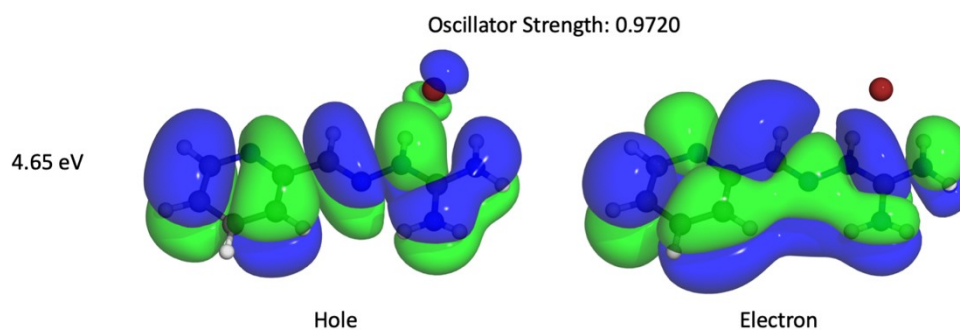

**Figure S12.** Natural Transition orbitals (NTOs) (isovalue=0.02 a.u.) of the  $E_2$  geometry for the first excited state computed at the TD- $\omega$ B97XD/def2-TZVPP (PCM=DMSO) level of theory.

### Excited states from time dependent density functional theory

To select the active space, initial TD-DFT calculations were run at TD- $\omega$ B97XD/def2-TZVPP (PCM=DMSO) level of theory for the  $E_1$  and  $E_2$  geometries. In  $E_1$ , the two lowest singlet excited states were found to be close together in energy, at 4.61 and 4.65 eV (Figure S11). However, the lower state has an oscillator strength of 0.0023, while the higher state has one of 0.9775. This indicates the latter state is initially populated in this photoisomerization, though the darker state can also be populated by internal conversion. Furthermore, the NTOs indicate that this state at 4.65 eV is also a  $\pi$ - $\pi^*$  state and is likely to be well-described by the choice of active space shown in Figure 3. Since the active space selected for CASSCF is chosen to describe the  $\pi$ - $\pi^*$  state, it becomes the  $S_1$  state for CASSCF. In  $E_2$ , the lowest energy excited state is at 4.65 eV and is  $\pi$ - $\pi^*$  state as indicated by the NOs (Figure S12). This state has a similarly large oscillator strength at 0.9720. Thus, the  $S_1$  state for both  $E_1$  and  $E_2$  can be characterized as  $\pi$ - $\pi^*$  states and indicate the active space for CASSCF was chosen appropriately.

### Excited states from Equation-of-Motion Coupled-Cluster Calculations with Single and Double excitations

TD-DFT calculations show that the  $n$ - $\pi^*$  and a  $\pi$ - $\pi^*$  states are nearly degenerate, with the  $n$ - $\pi^*$  state being 0.04 eV lower in energy. This prompts questions about the role of the  $n$ - $\pi^*$  state in the photochemical behavior of 2PyMIG·HBr on the  $S_1$  surface. We analyzed the state ordering for these systems using EOM-CCSD calculations, with solvent effects included using the PCM model beyond the linear response using the PTED formalism. The results shown in Table S1 show that the  $\pi$ - $\pi^*$  transitions are lower in energy and have a much larger oscillation strength compared to the  $n$ - $\pi^*$  transitions for both the Franck-Condon geometries and the  $S_1$  minima. Therefore, the lowest  $S_1$  excited state near the Franck-Condon geometries has  $\pi$ - $\pi^*$  character, justifying the choice of the active space for CASSCF that includes only the  $\pi$  orbitals.

Table S1. Excitation energies ( $\Delta E$ , eV) and oscillator strengths for the lowest energy  $\pi$ - $\pi^*$  and  $n$ - $\pi^*$  transitions of 2PyMIG·HBr in DMSO computed with the EOM-CCSD-PCM method using the PTED scheme.

| system <sup>a</sup>   | $\Delta E$ $\pi$ - $\pi^*$ | $\pi$ - $\pi^*$ oscillator strength | $\Delta E$ $n$ - $\pi^*$ | $n$ - $\pi^*$ oscillator strength |
|-----------------------|----------------------------|-------------------------------------|--------------------------|-----------------------------------|
| $E_1$ , Franck-Condon | 4.81                       | 0.478                               | 4.87                     | 0.0026                            |
| $E_2$ , Franck-Condon | 5.00                       | 0.394                               | 5.15                     | 0.0037                            |
| $E_1$ , minimum       | 4.46                       | 0.320                               | 4.71                     | 0.0014                            |
| $E_2$ , minimum       | 4.58                       | 0.249                               | 4.97                     | 0.0021                            |
| $Z_1$ , minimum       | 4.97                       | 0.464                               | 5.11                     | 0.0020                            |
| $Z_2$ , minimum       | 4.83                       | 0.454                               | 5.17                     | 0.0018                            |

### XYZ coordinates and CASSCF $S_0$ and $S_1$ energies for 2PyMIG·HBr and 2PyMIG<sup>+</sup>

For the geometries below, the CCNN and CNNC dihedral angles are listed with each XYZ coordinate as well as the CASSCF  $S_0$  and  $S_1$  energies.

2PyMIG·HBr  $E_1$  geometries:

Geometries from  $E_1$  to MECI<sub>1</sub> on the  $S_1$  surface.

23

CCNN: 180.23 CNNC: 183.45 E(S0): -3115.40216 E(S1): -3115.22237

|    |           |           |           |
|----|-----------|-----------|-----------|
| C  | 1.925479  | 1.404628  | -2.066415 |
| H  | 1.158082  | 1.248694  | -0.194130 |
| H  | 3.209070  | 1.873619  | -0.594029 |
| H  | 0.829637  | 1.008091  | -3.700228 |
| H  | 2.470055  | 1.376439  | -4.012454 |
| H  | 3.762866  | 2.223110  | -2.182125 |
| N  | -0.235167 | 0.679039  | -1.700404 |
| H  | -0.909658 | 0.591622  | 0.246084  |
| N  | 0.973682  | 1.085369  | -1.218216 |
| N  | 3.110608  | 1.760211  | -1.591611 |
| N  | 1.703222  | 1.366519  | -3.380058 |
| C  | -1.135835 | 0.451365  | -0.798645 |
| C  | -2.489615 | 0.001870  | -1.154891 |
| C  | -3.420915 | -0.210584 | -0.137528 |
| N  | -2.777565 | -0.186327 | -2.448081 |
| C  | -4.691670 | -0.631033 | -0.472230 |
| C  | -3.998943 | -0.589318 | -2.757247 |
| C  | -4.997278 | -0.827470 | -1.809170 |
| H  | -3.146612 | -0.047048 | 0.888633  |
| H  | -4.199502 | -0.731042 | -3.804088 |
| H  | -5.971614 | -1.153668 | -2.120164 |
| H  | -5.427521 | -0.801674 | 0.291671  |
| Br | 2.092310  | 1.813759  | 1.682018  |

23

CCNN: 180.27 CNNC: 183.16 E(S0): -3115.40141 E(S1): -3115.23195

|   |           |           |           |
|---|-----------|-----------|-----------|
| C | 1.936511  | 1.410727  | -2.069930 |
| H | 1.161655  | 1.254865  | -0.208285 |
| H | 3.216041  | 1.876536  | -0.590762 |
| H | 0.845883  | 1.016237  | -3.706721 |
| H | 2.488319  | 1.380061  | -4.013657 |
| H | 3.777466  | 2.225358  | -2.176300 |
| N | -0.236323 | 0.683892  | -1.711843 |
| H | -0.903736 | 0.598148  | 0.237179  |
| N | 0.981240  | 1.094841  | -1.223701 |
| N | 3.121309  | 1.764119  | -1.589011 |
| N | 1.719200  | 1.372759  | -3.384241 |
| C | -1.132419 | 0.456492  | -0.807112 |
| C | -2.475110 | 0.008324  | -1.155967 |
| C | -3.416931 | -0.208071 | -0.120376 |
| N | -2.770077 | -0.183215 | -2.461547 |
| C | -4.708311 | -0.636820 | -0.451724 |
| C | -4.012632 | -0.594183 | -2.767369 |
| C | -5.015188 | -0.834603 | -1.806180 |

|    |           |           |           |
|----|-----------|-----------|-----------|
| H  | -3.137846 | -0.043365 | 0.903670  |
| H  | -4.218334 | -0.736916 | -3.812220 |
| H  | -5.989071 | -1.161797 | -2.115946 |
| H  | -5.441686 | -0.808235 | 0.313384  |
| Br | 2.090076  | 1.811816  | 1.682169  |

23

CCNN: 180.17 CNNC: 183.05 E(S0): -3115.39857 E(S1): -3115.23445

|    |           |           |           |
|----|-----------|-----------|-----------|
| C  | 1.935716  | 1.410760  | -2.068226 |
| H  | 1.140332  | 1.248869  | -0.219130 |
| H  | 3.207169  | 1.877138  | -0.582015 |
| H  | 0.850757  | 1.013619  | -3.707117 |
| H  | 2.494772  | 1.376565  | -4.010447 |
| H  | 3.777117  | 2.226037  | -2.165304 |
| N  | -0.249586 | 0.678116  | -1.733109 |
| H  | -0.913990 | 0.593384  | 0.218915  |
| N  | 0.975881  | 1.095182  | -1.225438 |
| N  | 3.118439  | 1.763959  | -1.581347 |
| N  | 1.723496  | 1.371068  | -3.383692 |
| C  | -1.143812 | 0.451576  | -0.825000 |
| C  | -2.472754 | 0.007886  | -1.170973 |
| C  | -3.426403 | -0.213003 | -0.118973 |
| N  | -2.772193 | -0.184009 | -2.490467 |
| C  | -4.737773 | -0.647589 | -0.443979 |
| C  | -4.035809 | -0.600986 | -2.785070 |
| C  | -5.041158 | -0.843632 | -1.814304 |
| H  | -3.139264 | -0.047272 | 0.901882  |
| H  | -4.245938 | -0.743576 | -3.827894 |
| H  | -6.013854 | -1.170753 | -2.126894 |
| H  | -5.468053 | -0.819406 | 0.322052  |
| Br | 2.100388  | 1.815963  | 1.687527  |

23

CCNN: 180.07 CNNC: 182.91 E(S0): -3115.39521 E(S1): -3115.23506

|   |           |           |           |
|---|-----------|-----------|-----------|
| C | 1.929552  | 1.408877  | -2.069270 |
| H | 1.118501  | 1.243032  | -0.228165 |
| H | 3.194980  | 1.875100  | -0.578210 |
| H | 0.848834  | 1.009573  | -3.709773 |
| H | 2.494430  | 1.370001  | -4.009988 |
| H | 3.771144  | 2.223794  | -2.159973 |
| N | -0.263222 | 0.672669  | -1.752016 |
| H | -0.926202 | 0.588941  | 0.202276  |
| N | 0.965740  | 1.094512  | -1.229458 |
| N | 3.110741  | 1.761000  | -1.578380 |
| N | 1.721271  | 1.367281  | -3.385538 |
| C | -1.156782 | 0.446824  | -0.841269 |
| C | -2.477406 | 0.005564  | -1.186149 |
| C | -3.437117 | -0.218966 | -0.125050 |

|    |           |           |           |
|----|-----------|-----------|-----------|
| N  | -2.779185 | -0.185380 | -2.513622 |
| C  | -4.759131 | -0.656852 | -0.444813 |
| C  | -4.054172 | -0.605858 | -2.798735 |
| C  | -5.059655 | -0.850680 | -1.823151 |
| H  | -3.143750 | -0.052720 | 0.893490  |
| H  | -4.267024 | -0.747818 | -3.840382 |
| H  | -6.031384 | -1.178009 | -2.138154 |
| H  | -5.486913 | -0.829508 | 0.322105  |
| Br | 2.111744  | 1.820624  | 1.694695  |

23

CCNN: 180.02 CNNC: 181.45 E(S0): -3115.39525 E(S1): -3115.23510

|    |           |           |           |
|----|-----------|-----------|-----------|
| C  | 2.050402  | 0.990865  | -1.988344 |
| H  | 1.206413  | 0.869075  | -0.158171 |
| H  | 3.338992  | 1.303890  | -0.477659 |
| H  | 0.958735  | 0.709911  | -3.644930 |
| H  | 2.635290  | 0.900066  | -3.918838 |
| H  | 3.956294  | 1.641143  | -2.046278 |
| N  | -0.199061 | 0.436398  | -1.709434 |
| H  | -0.895033 | 0.376278  | 0.234633  |
| N  | 1.049016  | 0.765307  | -1.164136 |
| N  | 3.254633  | 1.220362  | -1.481082 |
| N  | 1.855702  | 0.986546  | -3.308205 |
| C  | -1.119808 | 0.264179  | -0.813723 |
| C  | -2.462019 | -0.078417 | -1.186922 |
| C  | -3.451402 | -0.261011 | -0.145356 |
| N  | -2.753154 | -0.218510 | -2.523293 |
| C  | -4.794405 | -0.600821 | -0.493780 |
| C  | -4.049547 | -0.544431 | -2.835054 |
| C  | -5.084476 | -0.742108 | -1.880217 |
| H  | -3.160181 | -0.137505 | 0.879847  |
| H  | -4.254065 | -0.647510 | -3.882930 |
| H  | -6.070174 | -0.995135 | -2.219428 |
| H  | -5.543685 | -0.741028 | 0.258859  |
| Br | 2.253020  | 1.288035  | 1.783993  |

23

CCNN: 179.97 CNNC: 181.60 E(S0): -3115.39525 E(S1): -3115.23510

|   |           |          |           |
|---|-----------|----------|-----------|
| C | 2.192440  | 0.534755 | -1.930490 |
| H | 1.321826  | 0.451552 | -0.110787 |
| H | 3.485891  | 0.714406 | -0.402833 |
| H | 1.098147  | 0.380522 | -3.602097 |
| H | 2.787653  | 0.436533 | -3.857579 |
| H | 4.144585  | 1.029811 | -1.958221 |
| N | -0.098505 | 0.167191 | -1.682565 |
| H | -0.816343 | 0.123431 | 0.253965  |
| N | 1.167764  | 0.374887 | -1.119721 |
| N | 3.406589  | 0.653151 | -1.408284 |

|    |           |           |           |
|----|-----------|-----------|-----------|
| N  | 2.011627  | 0.573293  | -3.251635 |
| C  | -1.039516 | 0.054938  | -0.798480 |
| C  | -2.402633 | -0.160995 | -1.190263 |
| C  | -3.413997 | -0.283336 | -0.161065 |
| N  | -2.692011 | -0.241588 | -2.531915 |
| C  | -4.778078 | -0.495776 | -0.528044 |
| C  | -4.008911 | -0.444487 | -2.861564 |
| C  | -5.066200 | -0.575235 | -1.919803 |
| H  | -3.122912 | -0.211945 | 0.869117  |
| H  | -4.211692 | -0.502069 | -3.913258 |
| H  | -6.066982 | -0.732004 | -2.272714 |
| H  | -5.543813 | -0.589524 | 0.215195  |
| Br | 2.375375  | 0.765046  | 1.847089  |

23

CCNN: 179.80 CNNC: 182.05 E(S0): -3115.39521 E(S1): -3115.23506

|    |           |           |           |
|----|-----------|-----------|-----------|
| C  | 2.345354  | 0.069060  | -1.916657 |
| H  | 1.458082  | 0.033903  | -0.103920 |
| H  | 3.637450  | 0.120974  | -0.379774 |
| H  | 1.252267  | 0.052644  | -3.596865 |
| H  | 2.943482  | -0.024062 | -3.843949 |
| H  | 4.329363  | 0.408477  | -1.923555 |
| N  | 0.029372  | -0.095806 | -1.687765 |
| H  | -0.701529 | -0.134783 | 0.243950  |
| N  | 1.306224  | -0.028050 | -1.114212 |
| N  | 3.562521  | 0.072935  | -1.386347 |
| N  | 2.176693  | 0.152509  | -3.236678 |
| C  | -0.923557 | -0.146849 | -0.810890 |
| C  | -2.298758 | -0.215596 | -1.213928 |
| C  | -3.323344 | -0.280851 | -0.192650 |
| N  | -2.586523 | -0.213749 | -2.558341 |
| C  | -4.699469 | -0.342862 | -0.570741 |
| C  | -3.915080 | -0.270341 | -2.898635 |
| C  | -4.985757 | -0.334415 | -1.965129 |
| H  | -3.032826 | -0.281075 | 0.840163  |
| H  | -4.116298 | -0.262836 | -3.952176 |
| H  | -5.995053 | -0.375452 | -2.326132 |
| H  | -5.475107 | -0.392060 | 0.166488  |
| Br | 2.516355  | 0.284030  | 1.860413  |

23

CCNN: 179.32 CNNC: 181.63 E(S0): -3115.39493 E(S1): -3115.23475

|   |          |           |           |
|---|----------|-----------|-----------|
| C | 2.490762 | -0.441161 | -1.929262 |
| H | 1.598256 | -0.384358 | -0.121585 |
| H | 3.775871 | -0.485116 | -0.390082 |
| H | 1.405818 | -0.319767 | -3.612373 |
| H | 3.088771 | -0.531542 | -3.858879 |
| H | 4.492177 | -0.255357 | -1.926858 |

|    |           |           |           |
|----|-----------|-----------|-----------|
| N  | 0.170345  | -0.377219 | -1.708243 |
| H  | -0.574558 | -0.455568 | 0.216803  |
| N  | 1.444261  | -0.471755 | -1.129614 |
| N  | 3.703332  | -0.548593 | -1.396222 |
| N  | 2.333191  | -0.327363 | -3.246584 |
| C  | -0.788937 | -0.382935 | -0.837160 |
| C  | -2.160818 | -0.279200 | -1.244785 |
| C  | -3.195122 | -0.312354 | -0.231851 |
| N  | -2.435452 | -0.145197 | -2.585266 |
| C  | -4.566344 | -0.190734 | -0.613310 |
| C  | -3.758709 | -0.020817 | -2.928177 |
| C  | -4.837684 | -0.035869 | -2.002148 |
| H  | -2.915408 | -0.426738 | 0.797606  |
| H  | -3.948508 | 0.095538  | -3.977432 |
| H  | -5.841817 | 0.069491  | -2.364500 |
| H  | -5.349023 | -0.212423 | 0.117777  |
| Br | 2.675159  | -0.089306 | 1.828686  |

23

CCNN: 177.98 CNNC: 174.50 E(S0): -3115.39326 E(S1): -3115.23301

|    |           |           |           |
|----|-----------|-----------|-----------|
| C  | 2.539910  | -1.011998 | -1.875517 |
| H  | 1.665541  | -0.720794 | -0.086429 |
| H  | 3.816437  | -1.080742 | -0.336457 |
| H  | 1.476545  | -0.813307 | -3.566922 |
| H  | 3.128974  | -1.218388 | -3.800995 |
| H  | 4.545626  | -1.001727 | -1.874167 |
| N  | 0.244033  | -0.666221 | -1.671165 |
| H  | -0.556690 | -0.914428 | 0.216057  |
| N  | 1.494406  | -0.914936 | -1.076774 |
| N  | 3.737667  | -1.218995 | -1.334958 |
| N  | 2.392171  | -0.941601 | -3.194721 |
| C  | -0.735954 | -0.699720 | -0.824890 |
| C  | -2.083106 | -0.426898 | -1.239279 |
| C  | -3.147163 | -0.507185 | -0.260440 |
| N  | -2.304197 | -0.084613 | -2.552306 |
| C  | -4.487676 | -0.194414 | -0.642238 |
| C  | -3.596397 | 0.228947  | -2.893008 |
| C  | -4.698850 | 0.193804  | -1.995632 |
| H  | -2.912318 | -0.797260 | 0.745472  |
| H  | -3.740365 | 0.518712  | -3.915649 |
| H  | -5.675079 | 0.458639  | -2.352683 |
| H  | -5.291016 | -0.243791 | 0.064714  |
| Br | 2.812926  | -0.224053 | 1.787813  |

23

CCNN: 174.88 CNNC: 159.06 E(S0): -3115.38879 E(S1): -3115.22833

|   |          |           |           |
|---|----------|-----------|-----------|
| C | 2.487792 | -1.496503 | -1.738408 |
| H | 1.674224 | -0.856326 | -0.016544 |

|    |           |           |           |
|----|-----------|-----------|-----------|
| H  | 3.760013  | -1.533161 | -0.198592 |
| H  | 1.453525  | -1.334251 | -3.454357 |
| H  | 3.035443  | -1.981070 | -3.627236 |
| H  | 4.481899  | -1.691277 | -1.729080 |
| N  | 0.247943  | -0.843701 | -1.593195 |
| H  | -0.656697 | -1.397124 | 0.176005  |
| N  | 1.466410  | -1.192666 | -0.961414 |
| N  | 3.660064  | -1.779335 | -1.174036 |
| N  | 2.339024  | -1.560084 | -3.057501 |
| C  | -0.775382 | -0.984173 | -0.812391 |
| C  | -2.089519 | -0.579358 | -1.228474 |
| C  | -3.205355 | -0.777433 | -0.327084 |
| N  | -2.229172 | 0.000156  | -2.466751 |
| C  | -4.506578 | -0.321199 | -0.698930 |
| C  | -3.483876 | 0.448368  | -2.796322 |
| C  | -4.629843 | 0.319978  | -1.964537 |
| H  | -3.037721 | -1.257401 | 0.617843  |
| H  | -3.560389 | 0.925251  | -3.754020 |
| H  | -5.571920 | 0.704109  | -2.304293 |
| H  | -5.345752 | -0.449078 | -0.045357 |
| Br | 2.930843  | -0.174014 | 1.731432  |

23

CCNN: 160.45 CNNC: 141.85 E(S0): -3115.35092 E(S1): -3115.23507

|    |           |           |           |
|----|-----------|-----------|-----------|
| C  | 2.434351  | -1.546657 | -1.677481 |
| H  | 1.734465  | -0.510510 | -0.085218 |
| H  | 3.831817  | -1.168191 | -0.291921 |
| H  | 1.235038  | -1.906436 | -3.258726 |
| H  | 2.828355  | -2.516133 | -3.408719 |
| H  | 4.430292  | -1.661877 | -1.815659 |
| N  | 0.206849  | -0.945708 | -1.397855 |
| H  | -0.882035 | -1.823824 | 0.116214  |
| N  | 1.464944  | -1.066099 | -0.908889 |
| N  | 3.663091  | -1.623694 | -1.181518 |
| N  | 2.166030  | -1.967339 | -2.909590 |
| C  | -0.965812 | -1.178869 | -0.739427 |
| C  | -2.196068 | -0.667389 | -1.164307 |
| C  | -3.388979 | -0.961601 | -0.441454 |
| N  | -2.208469 | 0.114888  | -2.282850 |
| C  | -4.584177 | -0.405965 | -0.860629 |
| C  | -3.359748 | 0.636811  | -2.659052 |
| C  | -4.580452 | 0.421618  | -1.992355 |
| H  | -3.343501 | -1.596142 | 0.424088  |
| H  | -3.328494 | 1.259784  | -3.535311 |
| H  | -5.480024 | 0.880752  | -2.355526 |
| H  | -5.494719 | -0.602797 | -0.325687 |
| Br | 2.968815  | -0.075492 | 1.712374  |



23

CCNN: 141.76 CNNC: 133.87 E(S0): -3115.32126 E(S1): -3115.24871

|    |           |           |           |
|----|-----------|-----------|-----------|
| C  | 2.403171  | -1.728836 | -1.558215 |
| H  | 1.641474  | -0.408640 | -0.220248 |
| H  | 3.763278  | -1.068181 | -0.236365 |
| H  | 1.221288  | -2.471623 | -3.004182 |
| H  | 2.831140  | -3.058989 | -3.019059 |
| H  | 4.403734  | -1.825393 | -1.644539 |
| N  | 0.157468  | -1.177469 | -1.424641 |
| H  | -1.035248 | -2.254921 | -0.129837 |
| N  | 1.404678  | -1.106662 | -0.927089 |
| N  | 3.620659  | -1.657157 | -1.052913 |
| N  | 2.157167  | -2.418103 | -2.666816 |
| C  | -1.037668 | -1.430547 | -0.821334 |
| C  | -2.235696 | -0.775928 | -1.170428 |
| C  | -3.451159 | -1.116342 | -0.519273 |
| N  | -2.190426 | 0.159076  | -2.155949 |
| C  | -4.613989 | -0.451965 | -0.872085 |
| C  | -3.310643 | 0.774283  | -2.481773 |
| C  | -4.553775 | 0.518368  | -1.876962 |
| H  | -3.452481 | -1.868253 | 0.247593  |
| H  | -3.235604 | 1.505803  | -3.266251 |
| H  | -5.428370 | 1.055068  | -2.191784 |
| H  | -5.543109 | -0.679689 | -0.383217 |
| Br | 2.970719  | 0.100529  | 1.648783  |

23

CCNN: 120.55 CNNC: 136.43 E(S0): -3115.28913 E(S1): -3115.26365

|   |           |           |           |
|---|-----------|-----------|-----------|
| C | 2.415430  | -1.891965 | -1.475167 |
| H | 1.533788  | -0.427029 | -0.382643 |
| H | 3.698291  | -0.985930 | -0.215050 |
| H | 1.312858  | -2.933658 | -2.786051 |
| H | 2.952490  | -3.424922 | -2.677228 |
| H | 4.420907  | -1.899751 | -1.494028 |
| N | 0.141014  | -1.504723 | -1.480192 |
| H | -1.152570 | -2.604347 | -0.308550 |
| N | 1.363718  | -1.230668 | -0.980998 |
| N | 3.609216  | -1.668456 | -0.966527 |
| N | 2.239286  | -2.767092 | -2.459738 |
| C | -1.061033 | -1.691855 | -0.872628 |
| C | -2.212297 | -0.894771 | -1.127862 |
| C | -3.439562 | -1.193618 | -0.491163 |
| N | -2.100348 | 0.109964  | -2.028215 |
| C | -4.554361 | -0.417302 | -0.775116 |
| C | -3.174495 | 0.828984  | -2.297885 |
| C | -4.429020 | 0.616387  | -1.703717 |
| H | -3.493117 | -2.002506 | 0.213064  |

|    |           |           |           |
|----|-----------|-----------|-----------|
| H  | -3.049595 | 1.608063  | -3.027707 |
| H  | -5.265223 | 1.234310  | -1.970456 |
| H  | -5.494382 | -0.612561 | -0.293211 |
| Br | 2.916137  | 0.244104  | 1.567343  |

23

CCNN: 106.95 CNNC: 142.24 E(S0): -3115.27824 E(S1): -3115.27633

|    |           |           |           |
|----|-----------|-----------|-----------|
| C  | 2.469682  | -1.776199 | -1.438969 |
| H  | 1.396199  | -0.372829 | -0.448177 |
| H  | 3.630640  | -0.636441 | -0.248622 |
| H  | 1.531120  | -3.079058 | -2.644746 |
| H  | 3.209387  | -3.344787 | -2.468910 |
| H  | 4.466947  | -1.554240 | -1.454374 |
| N  | 0.152061  | -1.699342 | -1.475307 |
| H  | -1.136828 | -2.755693 | -0.251187 |
| N  | 1.348925  | -1.211006 | -1.020935 |
| N  | 3.627681  | -1.366094 | -0.954952 |
| N  | 2.422889  | -2.748431 | -2.350966 |
| C  | -1.005051 | -1.838466 | -0.804366 |
| C  | -2.144087 | -0.989668 | -1.018978 |
| C  | -3.351169 | -1.249856 | -0.341497 |
| N  | -2.018779 | 0.023419  | -1.902633 |
| C  | -4.447626 | -0.428110 | -0.578836 |
| C  | -3.072762 | 0.785790  | -2.131688 |
| C  | -4.314092 | 0.609701  | -1.499451 |
| H  | -3.411020 | -2.065725 | 0.355237  |
| H  | -2.939560 | 1.573041  | -2.852512 |
| H  | -5.134599 | 1.262068  | -1.730869 |
| H  | -5.377193 | -0.595014 | -0.066726 |
| Br | 2.651035  | 0.617465  | 1.445824  |

23

CCNN: 104.92 CNNC: 150.45 E(S0): -3115.28170 E(S1): -3115.28061

|   |           |           |           |
|---|-----------|-----------|-----------|
| C | 2.527297  | -1.531519 | -1.372322 |
| H | 1.359366  | -0.312723 | -0.258931 |
| H | 3.604543  | -0.299401 | -0.197176 |
| H | 1.703482  | -2.897278 | -2.600735 |
| H | 3.397509  | -2.985228 | -2.465789 |
| H | 4.479686  | -1.057111 | -1.473403 |
| N | 0.205145  | -1.698733 | -1.327441 |
| H | -1.061353 | -2.720445 | -0.043823 |
| N | 1.379084  | -1.113657 | -0.894654 |
| N | 3.661545  | -1.016115 | -0.909461 |
| N | 2.559656  | -2.466996 | -2.331611 |
| C | -0.929682 | -1.831871 | -0.645383 |
| C | -2.095413 | -1.014004 | -0.898485 |
| C | -3.298794 | -1.290114 | -0.227884 |
| N | -1.976383 | -0.003627 | -1.781779 |

|    |           |           |           |
|----|-----------|-----------|-----------|
| C  | -4.406717 | -0.482722 | -0.472914 |
| C  | -3.036189 | 0.749405  | -2.014268 |
| C  | -4.278565 | 0.557532  | -1.388546 |
| H  | -3.352397 | -2.106219 | 0.468983  |
| H  | -2.906518 | 1.541377  | -2.729668 |
| H  | -5.104013 | 1.203421  | -1.621163 |
| H  | -5.337690 | -0.663421 | 0.031715  |
| Br | 2.330860  | 1.083295  | 1.310504  |

23

CCNN: 101.43 CNNC: 161.67 E(S0): -3115.28236 E(S1): -3115.28185

|    |           |           |           |
|----|-----------|-----------|-----------|
| C  | 2.532350  | -1.096652 | -1.460759 |
| H  | 1.319661  | -0.096688 | -0.193293 |
| H  | 3.521436  | 0.228934  | -0.319498 |
| H  | 1.811820  | -2.513639 | -2.696634 |
| H  | 3.502211  | -2.399979 | -2.646551 |
| H  | 4.347093  | -0.283738 | -1.723492 |
| N  | 0.263060  | -1.578454 | -1.226832 |
| H  | -0.953522 | -2.538983 | 0.148715  |
| N  | 1.389751  | -0.859473 | -0.879176 |
| N  | 3.635536  | -0.458918 | -1.049545 |
| N  | 2.619166  | -1.974985 | -2.474977 |
| C  | -0.857702 | -1.707958 | -0.537681 |
| C  | -2.062944 | -0.962321 | -0.845956 |
| C  | -3.252156 | -1.250224 | -0.159014 |
| N  | -1.979662 | 0.008509  | -1.775125 |
| C  | -4.388477 | -0.492365 | -0.435473 |
| C  | -3.063078 | 0.718455  | -2.032619 |
| C  | -4.295956 | 0.513402  | -1.392067 |
| H  | -3.275844 | -2.035566 | 0.573988  |
| H  | -2.960586 | 1.486284  | -2.778125 |
| H  | -5.141404 | 1.125122  | -1.644595 |
| H  | -5.311883 | -0.683273 | 0.079152  |
| Br | 2.035518  | 1.450040  | 1.257460  |

23

CCNN: 96.81 CNNC: 179.37 E(S0): -3115.28329 E(S1): -3115.28229

|   |           |           |           |
|---|-----------|-----------|-----------|
| C | 2.422735  | -0.646556 | -1.643739 |
| H | 1.309955  | 0.080950  | -0.125884 |
| H | 3.389101  | 0.722656  | -0.540754 |
| H | 1.705958  | -2.039587 | -2.910237 |
| H | 3.364909  | -1.733554 | -3.047609 |
| H | 4.038537  | 0.447458  | -2.081186 |
| N | 0.301852  | -1.458579 | -1.116247 |
| H | -0.899500 | -2.291324 | 0.344747  |
| N | 1.365323  | -0.610693 | -0.889597 |
| N | 3.500667  | 0.093281  | -1.320735 |
| N | 2.469782  | -1.422965 | -2.743355 |

|    |           |           |           |
|----|-----------|-----------|-----------|
| C  | -0.822798 | -1.547636 | -0.437179 |
| C  | -2.049371 | -0.881541 | -0.840688 |
| C  | -3.239578 | -1.135517 | -0.144209 |
| N  | -1.977757 | -0.003108 | -1.858030 |
| C  | -4.391906 | -0.439311 | -0.505782 |
| C  | -3.075371 | 0.649949  | -2.194382 |
| C  | -4.311232 | 0.473833  | -1.551334 |
| H  | -3.252752 | -1.847079 | 0.660584  |
| H  | -2.982215 | 1.346912  | -3.007540 |
| H  | -5.167844 | 1.037429  | -1.869640 |
| H  | -5.317521 | -0.606172 | 0.013123  |
| Br | 1.879829  | 1.640445  | 1.301106  |

23

CCNN: 93.06 CNNC: 199.37 E(S0): -3115.28495 E(S1): -3115.28328

|    |           |           |           |
|----|-----------|-----------|-----------|
| C  | 2.183271  | -0.268797 | -1.787230 |
| H  | 1.299376  | 0.184851  | -0.029436 |
| H  | 3.203265  | 1.071903  | -0.703233 |
| H  | 1.344967  | -1.552088 | -3.090348 |
| H  | 2.943090  | -1.109015 | -3.450394 |
| H  | 3.610032  | 1.012039  | -2.343655 |
| N  | 0.287853  | -1.371851 | -0.987190 |
| H  | -0.945822 | -2.042471 | 0.532967  |
| N  | 1.279989  | -0.422138 | -0.863293 |
| N  | 3.240105  | 0.530546  | -1.553454 |
| N  | 2.098213  | -0.913289 | -2.963057 |
| C  | -0.866643 | -1.405679 | -0.335983 |
| C  | -2.088802 | -0.826580 | -0.858636 |
| C  | -3.300959 | -1.017651 | -0.178817 |
| N  | -1.993252 | -0.076838 | -1.974155 |
| C  | -4.448715 | -0.393242 | -0.663071 |
| C  | -3.088006 | 0.509299  | -2.425460 |
| C  | -4.343443 | 0.389148  | -1.808567 |
| H  | -3.332762 | -1.626327 | 0.705729  |
| H  | -2.976152 | 1.103849  | -3.314187 |
| H  | -5.195971 | 0.894106  | -2.222050 |
| H  | -5.390359 | -0.514177 | -0.160685 |
| Br | 1.872727  | 1.759077  | 1.377163  |

23

CCNN: 91.21 CNNC: 215.06 E(S0): -3115.28596 E(S1): -3115.28424

|   |          |           |           |
|---|----------|-----------|-----------|
| C | 1.896594 | 0.149780  | -1.858528 |
| H | 1.276013 | 0.347648  | 0.054434  |
| H | 2.960944 | 1.490363  | -0.816453 |
| H | 0.895922 | -1.013451 | -3.163144 |
| H | 2.409714 | -0.450000 | -3.718690 |
| H | 3.159807 | 1.559028  | -2.499757 |
| N | 0.258640 | -1.217210 | -0.894281 |

|    |           |           |           |
|----|-----------|-----------|-----------|
| H  | -0.986127 | -1.829703 | 0.635662  |
| N  | 1.167900  | -0.173441 | -0.824623 |
| N  | 2.910943  | 1.013185  | -1.704714 |
| N  | 1.666289  | -0.390858 | -3.061447 |
| C  | -0.915926 | -1.253224 | -0.273891 |
| C  | -2.139138 | -0.774640 | -0.884441 |
| C  | -3.360492 | -0.885487 | -0.201256 |
| N  | -2.038360 | -0.192052 | -2.096142 |
| C  | -4.508673 | -0.356084 | -0.785626 |
| C  | -3.134838 | 0.305031  | -2.641765 |
| C  | -4.397108 | 0.255585  | -2.030679 |
| H  | -3.397260 | -1.362419 | 0.760620  |
| H  | -3.018438 | 0.765084  | -3.606515 |
| H  | -5.250217 | 0.681351  | -2.524119 |
| H  | -5.456369 | -0.419158 | -0.283930 |
| Br | 1.919639  | 1.959468  | 1.437668  |

23

CCNN: 89.31 CNNC: 224.60 E(S0): -3115.28596 E(S1): -3115.28594

|    |           |           |           |
|----|-----------|-----------|-----------|
| C  | 1.717569  | 0.400744  | -1.838752 |
| H  | 1.281141  | 0.555263  | 0.130999  |
| H  | 2.817468  | 1.769723  | -0.878219 |
| H  | 0.593075  | -0.742767 | -3.054528 |
| H  | 1.976143  | -0.040416 | -3.798470 |
| H  | 2.829617  | 1.893503  | -2.568962 |
| N  | 0.294475  | -1.084505 | -0.723044 |
| H  | -0.972820 | -1.627344 | 0.834897  |
| N  | 1.127026  | 0.020017  | -0.730361 |
| N  | 2.693572  | 1.313059  | -1.771136 |
| N  | 1.380226  | -0.133717 | -3.009468 |
| C  | -0.900046 | -1.120569 | -0.113067 |
| C  | -2.112270 | -0.729014 | -0.791055 |
| C  | -3.352893 | -0.823459 | -0.136587 |
| N  | -1.992435 | -0.227350 | -2.038597 |
| C  | -4.494252 | -0.362160 | -0.785800 |
| C  | -3.085433 | 0.202372  | -2.646748 |
| C  | -4.362404 | 0.165440  | -2.067799 |
| H  | -3.406009 | -1.232942 | 0.854993  |
| H  | -2.953012 | 0.596352  | -3.638410 |
| H  | -5.210499 | 0.536401  | -2.611556 |
| H  | -5.453856 | -0.412542 | -0.305810 |
| Br | 1.971569  | 2.235229  | 1.438391  |

Geometries from MECI<sub>1</sub> to E<sub>1</sub> on the S<sub>0</sub> surface.

23

CCNN: 89.31 CNNC: 224.60 E(S0): -3115.28596 E(S1): -3115.28594

|   |          |          |           |
|---|----------|----------|-----------|
| C | 1.717569 | 0.400744 | -1.838752 |
|---|----------|----------|-----------|

|    |           |           |           |
|----|-----------|-----------|-----------|
| H  | 1.281141  | 0.555263  | 0.130999  |
| H  | 2.817468  | 1.769723  | -0.878219 |
| H  | 0.593075  | -0.742767 | -3.054528 |
| H  | 1.976143  | -0.040416 | -3.798470 |
| H  | 2.829617  | 1.893503  | -2.568962 |
| N  | 0.294475  | -1.084505 | -0.723044 |
| H  | -0.972820 | -1.627344 | 0.834897  |
| N  | 1.127026  | 0.020017  | -0.730361 |
| N  | 2.693572  | 1.313059  | -1.771136 |
| N  | 1.380226  | -0.133717 | -3.009468 |
| C  | -0.900046 | -1.120569 | -0.113067 |
| C  | -2.112270 | -0.729014 | -0.791055 |
| C  | -3.352893 | -0.823459 | -0.136587 |
| N  | -1.992435 | -0.227350 | -2.038597 |
| C  | -4.494252 | -0.362160 | -0.785800 |
| C  | -3.085433 | 0.202372  | -2.646748 |
| C  | -4.362404 | 0.165440  | -2.067799 |
| H  | -3.406009 | -1.232942 | 0.854993  |
| H  | -2.953012 | 0.596352  | -3.638410 |
| H  | -5.210499 | 0.536401  | -2.611556 |
| H  | -5.453856 | -0.412542 | -0.305810 |
| Br | 1.971569  | 2.235229  | 1.438391  |

23

CCNN: 119.34 CNNC: 221.17 E(S0): -3115.33011 E(S1): -3115.23421

|   |           |           |           |
|---|-----------|-----------|-----------|
| C | 1.786415  | 0.512003  | -1.829710 |
| H | 1.454236  | 0.378095  | 0.161628  |
| H | 3.092487  | 1.531583  | -0.718941 |
| H | 0.451052  | -0.238115 | -3.122852 |
| H | 1.883043  | 0.401137  | -3.846878 |
| H | 3.087293  | 1.931158  | -2.361108 |
| N | 0.161376  | -0.869787 | -0.946166 |
| H | -0.975020 | -1.137080 | 0.786462  |
| N | 1.183046  | 0.035872  | -0.758850 |
| N | 2.888115  | 1.245792  | -1.666109 |
| N | 1.320557  | 0.247425  | -3.042800 |
| C | -0.949654 | -0.850468 | -0.254474 |
| C | -2.232546 | -0.664327 | -0.928454 |
| C | -3.405928 | -0.688051 | -0.164947 |
| N | -2.231872 | -0.392918 | -2.245293 |
| C | -4.620404 | -0.395830 | -0.782653 |
| C | -3.391249 | -0.123159 | -2.824334 |
| C | -4.615600 | -0.103651 | -2.141742 |
| H | -3.358325 | -0.909813 | 0.884932  |
| H | -3.356155 | 0.094515  | -3.876550 |
| H | -5.521082 | 0.134022  | -2.667086 |
| H | -5.534493 | -0.394500 | -0.218563 |

Br 2.030619 2.197601 1.478255  
23

CCNN: 146.96 CNNC: 212.63 E(S0): -3115.37645 E(S1): -3115.20061

|    |           |           |           |
|----|-----------|-----------|-----------|
| C  | 1.922235  | 0.679095  | -1.897573 |
| H  | 1.385307  | 0.412551  | 0.028294  |
| H  | 3.189153  | 1.486769  | -0.587018 |
| H  | 0.674144  | 0.161772  | -3.388652 |
| H  | 2.213747  | 0.743170  | -3.897564 |
| H  | 3.403775  | 1.986773  | -2.182947 |
| N  | 0.027331  | -0.538765 | -1.320675 |
| H  | -0.886877 | -0.498072 | 0.531033  |
| N  | 1.169195  | 0.186928  | -0.938935 |
| N  | 3.069192  | 1.277364  | -1.569057 |
| N  | 1.559432  | 0.566708  | -3.171497 |
| C  | -0.993517 | -0.465549 | -0.542219 |
| C  | -2.365308 | -0.519019 | -1.076521 |
| C  | -3.434898 | -0.495150 | -0.176019 |
| N  | -2.535598 | -0.490195 | -2.404910 |
| C  | -4.735898 | -0.413508 | -0.674669 |
| C  | -3.774373 | -0.416512 | -2.871801 |
| C  | -4.910347 | -0.369077 | -2.053557 |
| H  | -3.249604 | -0.516867 | 0.881021  |
| H  | -3.875483 | -0.385359 | -3.941257 |
| H  | -5.887397 | -0.294265 | -2.491453 |
| H  | -5.577753 | -0.383635 | -0.006470 |
| Br | 2.063747  | 2.107998  | 1.532253  |

23

CCNN: 168.07 CNNC: 200.77 E(S0): -3115.39680 E(S1): -3115.21922

|   |           |           |           |
|---|-----------|-----------|-----------|
| C | 1.970143  | 0.928879  | -2.004673 |
| H | 1.223481  | 0.693782  | -0.152809 |
| H | 3.178492  | 1.564635  | -0.550883 |
| H | 0.838532  | 0.521862  | -3.614281 |
| H | 2.448957  | 1.010847  | -3.970475 |
| H | 3.638308  | 2.026887  | -2.120625 |
| N | -0.104253 | -0.018110 | -1.620086 |
| H | -0.898853 | 0.104531  | 0.287517  |
| N | 1.070523  | 0.498551  | -1.139292 |
| N | 3.125130  | 1.391047  | -1.548764 |
| N | 1.719354  | 0.877481  | -3.309070 |
| C | -1.085422 | -0.025270 | -0.766708 |
| C | -2.470737 | -0.299510 | -1.184900 |
| C | -3.465061 | -0.355249 | -0.207234 |
| N | -2.732048 | -0.405566 | -2.491669 |
| C | -4.779022 | -0.516518 | -0.590023 |
| C | -4.020438 | -0.563486 | -2.851594 |
| C | -5.073604 | -0.617360 | -1.940045 |

|    |           |           |           |
|----|-----------|-----------|-----------|
| H  | -3.201853 | -0.271104 | 0.831281  |
| H  | -4.204210 | -0.636388 | -3.907430 |
| H  | -6.083630 | -0.733040 | -2.285286 |
| H  | -5.559494 | -0.553151 | 0.147564  |
| Br | 2.102613  | 1.976083  | 1.588618  |

23

CCNN: 179.91 CNNC: 182.77 E(S0): -3115.40214 E(S1): -3115.22430

|    |           |           |           |
|----|-----------|-----------|-----------|
| C  | 1.878198  | 1.241754  | -2.075009 |
| H  | 1.047863  | 1.139451  | -0.241507 |
| H  | 3.123737  | 1.750792  | -0.582640 |
| H  | 0.786494  | 0.827161  | -3.708444 |
| H  | 2.428427  | 1.210714  | -4.027334 |
| H  | 3.752979  | 1.972965  | -2.179045 |
| N  | -0.310838 | 0.576493  | -1.745486 |
| H  | -1.036588 | 0.512424  | 0.192067  |
| N  | 0.895142  | 0.963044  | -1.233649 |
| N  | 3.046682  | 1.601085  | -1.584634 |
| N  | 1.671909  | 1.152696  | -3.387434 |
| C  | -1.238565 | 0.375772  | -0.858265 |
| C  | -2.595707 | -0.043388 | -1.251663 |
| C  | -3.538387 | -0.293971 | -0.252827 |
| N  | -2.869858 | -0.164358 | -2.553736 |
| C  | -4.810240 | -0.684844 | -0.608909 |
| C  | -4.117844 | -0.546791 | -2.889547 |
| C  | -5.116886 | -0.816783 | -1.953973 |
| H  | -3.268096 | -0.180633 | 0.781037  |
| H  | -4.310466 | -0.634566 | -3.943238 |
| H  | -6.095382 | -1.117766 | -2.278228 |
| H  | -5.549305 | -0.882793 | 0.145096  |
| Br | 2.184014  | 1.827535  | 1.646746  |

Geometries from MECI<sub>1</sub> to Z<sub>1</sub> on the S<sub>0</sub> surface.

23

CCNN: 89.31 CNNC: 224.60 E(S0): -3115.28596 E(S1): -3115.28594

|   |           |           |           |
|---|-----------|-----------|-----------|
| C | 1.717569  | 0.400744  | -1.838752 |
| H | 1.281141  | 0.555263  | 0.130999  |
| H | 2.817468  | 1.769723  | -0.878219 |
| H | 0.593075  | -0.742767 | -3.054528 |
| H | 1.976143  | -0.040416 | -3.798470 |
| H | 2.829617  | 1.893503  | -2.568962 |
| N | 0.294475  | -1.084505 | -0.723044 |
| H | -0.972820 | -1.627344 | 0.834897  |
| N | 1.127026  | 0.020017  | -0.730361 |
| N | 2.693572  | 1.313059  | -1.771136 |
| N | 1.380226  | -0.133717 | -3.009468 |
| C | -0.900046 | -1.120569 | -0.113067 |



|    |           |           |           |
|----|-----------|-----------|-----------|
| C  | -2.112270 | -0.729014 | -0.791055 |
| C  | -3.352893 | -0.823459 | -0.136587 |
| N  | -1.992435 | -0.227350 | -2.038597 |
| C  | -4.494252 | -0.362160 | -0.785800 |
| C  | -3.085433 | 0.202372  | -2.646748 |
| C  | -4.362404 | 0.165440  | -2.067799 |
| H  | -3.406009 | -1.232942 | 0.854993  |
| H  | -2.953012 | 0.596352  | -3.638410 |
| H  | -5.210499 | 0.536401  | -2.611556 |
| H  | -5.453856 | -0.412542 | -0.305810 |
| Br | 1.971569  | 2.235229  | 1.438391  |

23

CCNN: 41.64 CNNC: 222.87 E(S0): -3115.36208 E(S1): -3115.21579

|    |           |           |           |
|----|-----------|-----------|-----------|
| C  | 1.836796  | 0.080804  | -1.754768 |
| H  | 0.931632  | 0.607048  | -0.034342 |
| H  | 2.443731  | 1.874748  | -1.084321 |
| H  | 1.364177  | -1.642383 | -2.709999 |
| H  | 2.693315  | -0.795460 | -3.367164 |
| H  | 2.771820  | 1.562000  | -2.730573 |
| N  | 0.541894  | -1.427132 | -0.449823 |
| H  | -0.926645 | -2.288810 | 0.558590  |
| N  | 1.074263  | -0.134373 | -0.720112 |
| N  | 2.563018  | 1.200568  | -1.826640 |
| N  | 1.928370  | -0.824635 | -2.734554 |
| C  | -0.698180 | -1.456333 | -0.084109 |
| C  | -1.847735 | -0.694755 | -0.605127 |
| C  | -3.116413 | -0.935158 | -0.067479 |
| N  | -1.645747 | 0.151009  | -1.624751 |
| C  | -4.214606 | -0.264212 | -0.604478 |
| C  | -2.694251 | 0.779272  | -2.135659 |
| C  | -4.001752 | 0.610652  | -1.663501 |
| H  | -3.237621 | -1.630616 | 0.741902  |
| H  | -2.494705 | 1.440832  | -2.958886 |
| H  | -4.812753 | 1.146602  | -2.119225 |
| H  | -5.201151 | -0.427830 | -0.211837 |
| Br | 1.751420  | 2.325405  | 1.279264  |

23

CCNN: 12.05 CNNC: 201.38 E(S0): -3115.39056 E(S1): -3115.20945

|   |           |           |           |
|---|-----------|-----------|-----------|
| C | 2.361611  | -0.353511 | -1.377124 |
| H | 0.876511  | 0.517342  | -0.297047 |
| H | 2.751403  | 1.568847  | -0.918145 |
| H | 2.302507  | -2.304374 | -1.841030 |
| H | 3.777419  | -1.530475 | -2.202493 |
| H | 3.702751  | 0.902404  | -2.198071 |
| N | 0.665082  | -1.620018 | -0.394218 |
| H | -0.899070 | -2.642054 | 0.204045  |

|    |           |           |           |
|----|-----------|-----------|-----------|
| N  | 1.217918  | -0.368190 | -0.729927 |
| N  | 3.066936  | 0.764589  | -1.446150 |
| N  | 2.808518  | -1.459227 | -1.984457 |
| C  | -0.593760 | -1.676098 | -0.155820 |
| C  | -1.684503 | -0.706569 | -0.377830 |
| C  | -2.952091 | -1.002278 | 0.126836  |
| N  | -1.444881 | 0.368971  | -1.128822 |
| C  | -3.995293 | -0.146929 | -0.154213 |
| C  | -2.450596 | 1.186568  | -1.396835 |
| C  | -3.749567 | 0.973888  | -0.936211 |
| H  | -3.106172 | -1.881710 | 0.722934  |
| H  | -2.216352 | 2.040047  | -2.004474 |
| H  | -4.533081 | 1.664563  | -1.186765 |
| H  | -4.981438 | -0.347841 | 0.222054  |
| Br | 1.402984  | 2.461159  | 0.882036  |

23

CCNN: 1.81 CNNC: 176.98 E(S0): -3115.39561 E(S1): -3115.21457

|    |           |           |           |
|----|-----------|-----------|-----------|
| C  | 2.674344  | -0.702882 | -0.750404 |
| H  | 0.886517  | 0.219861  | -0.494750 |
| H  | 2.840852  | 1.288083  | -0.483549 |
| H  | 2.794110  | -2.700849 | -0.801059 |
| H  | 4.296776  | -1.901325 | -0.753290 |
| H  | 4.297406  | 0.465986  | -0.962323 |
| N  | 0.730888  | -1.887121 | -0.390575 |
| H  | -0.918858 | -2.897278 | 0.016938  |
| N  | 1.355367  | -0.692434 | -0.620195 |
| N  | 3.326322  | 0.435614  | -0.755838 |
| N  | 3.317942  | -1.862109 | -0.927576 |
| C  | -0.548719 | -1.911493 | -0.199172 |
| C  | -1.536780 | -0.808204 | -0.216965 |
| C  | -2.723400 | -0.919515 | 0.513331  |
| N  | -1.250839 | 0.253605  | -0.968496 |
| C  | -3.619230 | 0.124291  | 0.478374  |
| C  | -2.109843 | 1.268066  | -0.993442 |
| C  | -3.316581 | 1.246936  | -0.284955 |
| H  | -2.923931 | -1.801369 | 1.093483  |
| H  | -1.821551 | 2.115449  | -1.581599 |
| H  | -3.982012 | 2.087455  | -0.329534 |
| H  | -4.535132 | 0.073993  | 1.037452  |
| Br | 1.116991  | 2.574763  | 0.377035  |

23

CCNN: 0.52 CNNC: 182.50 E(S0): -3115.39996 E(S1): -3115.21559

|   |          |           |           |
|---|----------|-----------|-----------|
| C | 2.491317 | -0.929358 | -0.400404 |
| H | 0.658849 | -0.004050 | -0.147296 |
| H | 2.683476 | 1.093954  | -0.337964 |
| H | 2.589370 | -2.933845 | -0.375141 |

|    |           |           |           |
|----|-----------|-----------|-----------|
| H  | 4.102596  | -2.147421 | -0.472480 |
| H  | 4.127387  | 0.197745  | -0.690454 |
| N  | 0.529019  | -2.129800 | -0.067830 |
| H  | -1.135106 | -3.161926 | 0.176404  |
| N  | 1.176399  | -0.898196 | -0.205064 |
| N  | 3.155473  | 0.196382  | -0.481410 |
| N  | 3.112581  | -2.103975 | -0.541979 |
| C  | -0.745701 | -2.166021 | 0.074479  |
| C  | -1.759882 | -1.060984 | 0.116681  |
| C  | -3.112086 | -1.353640 | 0.269861  |
| N  | -1.310629 | 0.186473  | 0.001782  |
| C  | -4.006476 | -0.296731 | 0.297040  |
| C  | -2.156802 | 1.187842  | 0.034579  |
| C  | -3.528446 | 0.994263  | 0.177957  |
| H  | -3.450019 | -2.369056 | 0.363746  |
| H  | -1.724585 | 2.166320  | -0.051146 |
| H  | -4.191821 | 1.837444  | 0.196528  |
| H  | -5.059166 | -0.480962 | 0.411279  |
| Br | 1.332348  | 2.827097  | 0.071603  |

*2PyMIGHBr E<sub>2</sub> geometries:*

Geometries from E<sub>2</sub> to MECl<sub>2</sub> on the S<sub>1</sub> surface.

23

CCNN: 179.68 CNNC: 182.73 E(S0): -3115.40299 E(S1): -3115.22124

|   |           |           |           |
|---|-----------|-----------|-----------|
| C | -1.971684 | -3.802363 | 2.653184  |
| H | -1.057310 | -3.884981 | 0.867333  |
| H | -0.515197 | -5.181232 | 2.548474  |
| H | -3.485209 | -2.529118 | 2.994997  |
| H | -3.004460 | -3.444036 | 4.353212  |
| H | -1.481313 | -5.241255 | 3.970202  |
| N | -2.551533 | -2.401270 | 0.897094  |
| H | -1.473193 | -2.545321 | -0.880289 |
| N | -1.741788 | -3.372522 | 1.430408  |
| N | -1.184697 | -4.736720 | 3.166247  |
| N | -2.981785 | -3.301314 | 3.369478  |
| C | -2.277734 | -2.086321 | -0.330437 |
| C | -3.077249 | -1.046251 | -1.056459 |
| C | -4.234694 | -0.471456 | -0.535033 |
| N | -2.582088 | -0.725884 | -2.255780 |
| C | -4.896081 | 0.478468  | -1.296851 |
| C | -3.224530 | 0.188084  | -2.974393 |
| C | -4.388721 | 0.818071  | -2.532857 |
| H | -4.600019 | -0.766181 | 0.427890  |
| H | -2.801248 | 0.423889  | -3.932554 |
| H | -4.874295 | 1.548880  | -3.153602 |
| H | -5.794971 | 0.940543  | -0.928160 |

Br 0.452428 -5.496450 0.326878

23

CCNN: 178.45 CNNC: 182.27 E(S0): -3115.39887 E(S1): -3115.23380

C -1.967861 -3.805166 2.651428  
H -1.070311 -3.906037 0.856227  
H -0.545646 -5.213862 2.528609  
H -3.453785 -2.502984 3.005685  
H -2.979864 -3.427748 4.359650  
H -1.493415 -5.254785 3.962960  
N -2.544812 -2.386349 0.894294  
H -1.459943 -2.527058 -0.875042  
N -1.739205 -3.380591 1.426050  
N -1.194867 -4.755315 3.156530  
N -2.962094 -3.284852 3.375993  
C -2.269262 -2.072029 -0.328842  
C -3.059255 -1.055281 -1.046036  
C -4.245959 -0.484972 -0.522586  
N -2.552511 -0.720087 -2.259137  
C -4.929229 0.476542 -1.295278  
C -3.214222 0.204227 -2.986823  
C -4.402145 0.827258 -2.548234  
H -4.612319 -0.788432 0.436906  
H -2.787603 0.448492 -3.940774  
H -4.888649 1.553024 -3.172343  
H -5.834736 0.926389 -0.932383  
Br 0.453036 -5.495342 0.328598

23

CCNN: 179.10 CNNC: 182.07 E(S0): -3115.39702 E(S1): -3115.23447

C -1.977712 -3.815205 2.648327  
H -1.061863 -3.896109 0.855367  
H -0.525853 -5.198324 2.542534  
H -3.485311 -2.535628 2.989397  
H -3.004264 -3.447730 4.349524  
H -1.486851 -5.252471 3.966938  
N -2.568604 -2.390238 0.888575  
H -1.469532 -2.534886 -0.868727  
N -1.745550 -3.388885 1.423868  
N -1.191153 -4.750565 3.160822  
N -2.984162 -3.308785 3.365447  
C -2.282360 -2.074204 -0.332564  
C -3.046814 -1.075484 -1.039877  
C -4.241206 -0.477676 -0.504612  
N -2.541585 -0.748320 -2.277454  
C -4.938340 0.502596 -1.279916  
C -3.217542 0.191837 -3.002076  
C -4.402763 0.837478 -2.555541

|    |           |           |           |
|----|-----------|-----------|-----------|
| H  | -4.597482 | -0.775674 | 0.459958  |
| H  | -2.797782 | 0.426793  | -3.960601 |
| H  | -4.880504 | 1.563910  | -3.183814 |
| H  | -5.833513 | 0.962670  | -0.910923 |
| Br | 0.456299  | -5.493452 | 0.329520  |

23

CCNN: 179.44 CNNC: 181.90 E(S0): -3115.39579 E(S1): -3115.23462

|    |           |           |           |
|----|-----------|-----------|-----------|
| C  | -1.986174 | -3.823168 | 2.645007  |
| H  | -1.058978 | -3.890996 | 0.855512  |
| H  | -0.516483 | -5.188744 | 2.548204  |
| H  | -3.508211 | -2.558988 | 2.978500  |
| H  | -3.022058 | -3.463243 | 4.341973  |
| H  | -1.484479 | -5.253238 | 3.967388  |
| N  | -2.580947 | -2.397566 | 0.885459  |
| H  | -1.472723 | -2.538338 | -0.865755 |
| N  | -1.752031 | -3.394332 | 1.421746  |
| N  | -1.191025 | -4.748799 | 3.162013  |
| N  | -3.000471 | -3.326303 | 3.357657  |
| C  | -2.288222 | -2.077357 | -0.333960 |
| C  | -3.045945 | -1.080520 | -1.039920 |
| C  | -4.235064 | -0.469146 | -0.499156 |
| N  | -2.546374 | -0.762698 | -2.285765 |
| C  | -4.933511 | 0.515173  | -1.273374 |
| C  | -3.224060 | 0.181411  | -3.007444 |
| C  | -4.401446 | 0.839128  | -2.555803 |
| H  | -4.585752 | -0.761557 | 0.469111  |
| H  | -2.809279 | 0.409358  | -3.969733 |
| H  | -4.876319 | 1.566401  | -3.185041 |
| H  | -5.822309 | 0.982933  | -0.899963 |
| Br | 0.458885  | -5.491800 | 0.330762  |

23

CCNN: 178.79 CNNC: 179.11 E(S0): -3115.39511 E(S1): -3115.23409

|   |           |           |           |
|---|-----------|-----------|-----------|
| C | -1.817773 | -3.714869 | 2.694143  |
| H | -0.975640 | -3.841021 | 0.868230  |
| H | -0.473251 | -5.196394 | 2.526131  |
| H | -3.287497 | -2.393061 | 3.068422  |
| H | -2.861535 | -3.385224 | 4.402004  |
| H | -1.341568 | -5.162787 | 4.008376  |
| N | -2.419029 | -2.278072 | 0.947238  |
| H | -1.254410 | -2.338072 | -0.771114 |
| N | -1.584650 | -3.280798 | 1.469639  |
| N | -1.066125 | -4.694069 | 3.175713  |
| N | -2.765814 | -3.153402 | 3.441019  |
| C | -2.095238 | -1.910489 | -0.251357 |
| C | -2.855851 | -0.912940 | -0.950739 |
| C | -4.070928 | -0.340681 | -0.423724 |

|    |           |           |           |
|----|-----------|-----------|-----------|
| N  | -2.335684 | -0.554108 | -2.177451 |
| C  | -4.777167 | 0.642693  | -1.191967 |
| C  | -3.018517 | 0.393322  | -2.890069 |
| C  | -4.222627 | 1.010318  | -2.452466 |
| H  | -4.438831 | -0.672197 | 0.525358  |
| H  | -2.584111 | 0.656613  | -3.834515 |
| H  | -4.698737 | 1.740430  | -3.077445 |
| H  | -5.690245 | 1.072191  | -0.831593 |
| Br | 0.286774  | -5.629705 | 0.253195  |

23

CCNN: 178.05 CNNC: 174.92 E(S0): -3115.39421 E(S1): -3115.23302

|    |           |           |           |
|----|-----------|-----------|-----------|
| C  | -1.576831 | -3.573270 | 2.734325  |
| H  | -0.874804 | -3.792945 | 0.861835  |
| H  | -0.356939 | -5.152933 | 2.513350  |
| H  | -2.988040 | -2.199993 | 3.144107  |
| H  | -2.590126 | -3.229280 | 4.459419  |
| H  | -1.062440 | -4.987259 | 4.074396  |
| N  | -2.251914 | -2.181663 | 0.978967  |
| H  | -1.058754 | -2.157543 | -0.719708 |
| N  | -1.386778 | -3.169075 | 1.489452  |
| N  | -0.856791 | -4.586352 | 3.188227  |
| N  | -2.433895 | -2.933083 | 3.524602  |
| C  | -1.925015 | -1.776481 | -0.205903 |
| C  | -2.719705 | -0.800932 | -0.900077 |
| C  | -3.987301 | -0.325832 | -0.401093 |
| N  | -2.178945 | -0.366318 | -2.092626 |
| C  | -4.727139 | 0.637880  | -1.162347 |
| C  | -2.893083 | 0.564459  | -2.796716 |
| C  | -4.150096 | 1.087600  | -2.385748 |
| H  | -4.369919 | -0.719348 | 0.518061  |
| H  | -2.441059 | 0.891009  | -3.712729 |
| H  | -4.648764 | 1.808794  | -3.003441 |
| H  | -5.681138 | 0.991254  | -0.826091 |
| Br | 0.128817  | -5.739852 | 0.210797  |

23

CCNN: 177.28 CNNC: 165.89 E(S0): -3115.39254 E(S1): -3115.23109

|   |           |           |           |
|---|-----------|-----------|-----------|
| C | -1.302430 | -3.423320 | 2.724347  |
| H | -0.801511 | -3.777607 | 0.812315  |
| H | -0.188217 | -5.076675 | 2.485694  |
| H | -2.651124 | -2.002891 | 3.164771  |
| H | -2.207328 | -2.996599 | 4.486517  |
| H | -0.697576 | -4.764553 | 4.102851  |
| N | -2.115386 | -2.123075 | 0.955720  |
| H | -0.860418 | -1.936483 | -0.686179 |
| N | -1.200970 | -3.084453 | 1.448582  |
| N | -0.590922 | -4.444853 | 3.167770  |

|    |           |           |           |
|----|-----------|-----------|-----------|
| N  | -2.054363 | -2.699270 | 3.551160  |
| C  | -1.771149 | -1.640906 | -0.193873 |
| C  | -2.609015 | -0.693404 | -0.878777 |
| C  | -3.937856 | -0.358798 | -0.427360 |
| N  | -2.046003 | -0.143095 | -2.011210 |
| C  | -4.718751 | 0.582614  | -1.174887 |
| C  | -2.800427 | 0.767057  | -2.700648 |
| C  | -4.118974 | 1.155344  | -2.334583 |
| H  | -4.332784 | -0.842225 | 0.442442  |
| H  | -2.330539 | 1.187524  | -3.568114 |
| H  | -4.645827 | 1.868108  | -2.938469 |
| H  | -5.717914 | 0.829540  | -0.876950 |
| Br | -0.026851 | -5.850296 | 0.201615  |

23

CCNN: 176.61 CNNC: 152.41 E(S0): -3115.38973 E(S1): -3115.22793

|    |           |           |           |
|----|-----------|-----------|-----------|
| C  | -1.035808 | -3.279484 | 2.647959  |
| H  | -0.776048 | -3.799101 | 0.729236  |
| H  | -0.002577 | -4.987284 | 2.427692  |
| H  | -2.316954 | -1.807284 | 3.113019  |
| H  | -1.763499 | -2.713760 | 4.449260  |
| H  | -0.306033 | -4.520193 | 4.061382  |
| N  | -2.030798 | -2.103743 | 0.876519  |
| H  | -0.692310 | -1.683880 | -0.650853 |
| N  | -1.059494 | -3.036005 | 1.347447  |
| N  | -0.312452 | -4.290348 | 3.094538  |
| N  | -1.673544 | -2.466239 | 3.491153  |
| C  | -1.655989 | -1.505505 | -0.205575 |
| C  | -2.531351 | -0.579660 | -0.877128 |
| C  | -3.913389 | -0.406280 | -0.500872 |
| N  | -1.948319 | 0.113737  | -1.916210 |
| C  | -4.729092 | 0.520407  | -1.228673 |
| C  | -2.738817 | 1.007732  | -2.586834 |
| C  | -4.110569 | 1.242568  | -2.291537 |
| H  | -4.316511 | -0.996809 | 0.296095  |
| H  | -2.254036 | 1.541376  | -3.380778 |
| H  | -4.661782 | 1.953467  | -2.875457 |
| H  | -5.765299 | 0.648780  | -0.988140 |
| Br | -0.166991 | -5.964696 | 0.227040  |

23

CCNN: 175.81 CNNC: 137.19 E(S0): -3115.38644 E(S1): -3115.22426

|   |           |           |          |
|---|-----------|-----------|----------|
| C | -0.808664 | -3.158782 | 2.527482 |
| H | -0.791090 | -3.848576 | 0.647736 |
| H | 0.156422  | -4.911658 | 2.348780 |
| H | -2.008455 | -1.621413 | 3.005699 |
| H | -1.327557 | -2.428440 | 4.340819 |
| H | 0.053547  | -4.292477 | 3.958505 |

|    |           |           |           |
|----|-----------|-----------|-----------|
| N  | -1.987979 | -2.114035 | 0.772107  |
| H  | -0.578564 | -1.447113 | -0.593174 |
| N  | -0.970870 | -3.023173 | 1.223594  |
| N  | -0.068598 | -4.153979 | 2.982174  |
| N  | -1.326683 | -2.253251 | 3.362534  |
| C  | -1.585842 | -1.390147 | -0.217843 |
| C  | -2.487744 | -0.476813 | -0.875343 |
| C  | -3.902514 | -0.450670 | -0.593657 |
| N  | -1.895586 | 0.353364  | -1.801871 |
| C  | -4.742298 | 0.469066  | -1.301764 |
| C  | -2.711984 | 1.236519  | -2.455935 |
| C  | -4.116570 | 1.332146  | -2.249653 |
| H  | -4.306520 | -1.141085 | 0.118134  |
| H  | -2.220934 | 1.876276  | -3.162879 |
| H  | -4.685549 | 2.045645  | -2.812864 |
| H  | -5.799879 | 0.491580  | -1.131241 |
| Br | -0.279310 | -6.067655 | 0.270860  |

23

CCNN: 166.46 CNNC: 126.30 E(S0): -3115.35077 E(S1): -3115.23989

|    |           |           |           |
|----|-----------|-----------|-----------|
| C  | -0.763869 | -3.145947 | 2.511499  |
| H  | -0.954317 | -3.946123 | 0.660376  |
| H  | -0.092976 | -5.032116 | 2.349247  |
| H  | -1.633038 | -1.388138 | 2.927116  |
| H  | -1.019792 | -2.215537 | 4.286104  |
| H  | -0.014864 | -4.345124 | 3.941223  |
| N  | -1.796359 | -2.087726 | 0.715942  |
| H  | -0.459048 | -1.096036 | -0.530407 |
| N  | -0.994249 | -3.065941 | 1.184569  |
| N  | -0.178213 | -4.225044 | 2.966943  |
| N  | -1.069215 | -2.121070 | 3.297157  |
| C  | -1.496389 | -1.172652 | -0.269539 |
| C  | -2.455337 | -0.367045 | -0.895079 |
| C  | -3.857261 | -0.506178 | -0.685154 |
| N  | -1.947961 | 0.570637  | -1.748243 |
| C  | -4.725333 | 0.330191  | -1.370758 |
| C  | -2.793350 | 1.358485  | -2.381671 |
| C  | -4.192862 | 1.290814  | -2.238376 |
| H  | -4.224072 | -1.267514 | -0.023123 |
| H  | -2.352926 | 2.084410  | -3.041692 |
| H  | -4.823403 | 1.961483  | -2.790400 |
| H  | -5.787840 | 0.232022  | -1.245096 |
| Br | -0.301302 | -6.101580 | 0.291977  |

23

CCNN: 152.68 CNNC: 121.05 E(S0): -3115.33087 E(S1): -3115.24894

|   |           |           |          |
|---|-----------|-----------|----------|
| C | -0.601688 | -3.101088 | 2.489255 |
| H | -1.035938 | -3.898037 | 0.670813 |



|    |           |           |           |
|----|-----------|-----------|-----------|
| H  | -0.074184 | -5.030836 | 2.282625  |
| H  | -1.235533 | -1.252738 | 2.927561  |
| H  | -0.549031 | -2.099980 | 4.246394  |
| H  | 0.187923  | -4.342665 | 3.858522  |
| N  | -1.687550 | -1.956949 | 0.792596  |
| H  | -0.387395 | -0.768515 | -0.309717 |
| N  | -0.979195 | -3.020479 | 1.191223  |
| N  | -0.071576 | -4.220470 | 2.905657  |
| N  | -0.728207 | -2.038616 | 3.270214  |
| C  | -1.425044 | -1.003668 | -0.169361 |
| C  | -2.420270 | -0.298726 | -0.860198 |
| C  | -3.810521 | -0.572628 | -0.739929 |
| N  | -1.956502 | 0.693028  | -1.673834 |
| C  | -4.709065 | 0.184057  | -1.476149 |
| C  | -2.828806 | 1.396331  | -2.364890 |
| C  | -4.220816 | 1.194576  | -2.309793 |
| H  | -4.146596 | -1.363496 | -0.096917 |
| H  | -2.420807 | 2.163264  | -2.998999 |
| H  | -4.878486 | 1.806012  | -2.897888 |
| H  | -5.763951 | -0.009070 | -1.410857 |
| Br | -0.387386 | -6.128946 | 0.304872  |

23

CCNN: 137.22 CNNC: 123.77 E(S0): -3115.31327 E(S1): -3115.25716

|    |           |           |           |
|----|-----------|-----------|-----------|
| C  | -0.442460 | -3.077304 | 2.515174  |
| H  | -1.073019 | -3.801935 | 0.722670  |
| H  | -0.028325 | -5.027464 | 2.227814  |
| H  | -0.898443 | -1.195970 | 3.023907  |
| H  | -0.143470 | -2.106423 | 4.266638  |
| H  | 0.388229  | -4.388077 | 3.792459  |
| N  | -1.566829 | -1.805356 | 0.949122  |
| H  | -0.335814 | -0.515729 | -0.119903 |
| N  | -0.933791 | -2.947476 | 1.261349  |
| N  | 0.047960  | -4.235059 | 2.870243  |
| N  | -0.429313 | -2.023868 | 3.318189  |
| C  | -1.342550 | -0.884022 | -0.052706 |
| C  | -2.359945 | -0.289690 | -0.823778 |
| C  | -3.726450 | -0.666422 | -0.752535 |
| N  | -1.937392 | 0.708915  | -1.647589 |
| C  | -4.646946 | -0.004545 | -1.552228 |
| C  | -2.827009 | 1.318026  | -2.404504 |
| C  | -4.199647 | 1.011005  | -2.400936 |
| H  | -4.031719 | -1.453295 | -0.089862 |
| H  | -2.449826 | 2.092119  | -3.048752 |
| H  | -4.875207 | 1.551821  | -3.036157 |
| H  | -5.687035 | -0.271223 | -1.519202 |
| Br | -0.489570 | -6.107044 | 0.296569  |

23

CCNN: 122.36 CNNC: 129.39 E(S0): -3115.29399 E(S1): -3115.26725

|    |           |           |           |
|----|-----------|-----------|-----------|
| C  | -0.322996 | -3.065965 | 2.554199  |
| H  | -1.105605 | -3.693251 | 0.785465  |
| H  | -0.029011 | -5.028715 | 2.190768  |
| H  | -0.614715 | -1.172482 | 3.134280  |
| H  | 0.167089  | -2.163411 | 4.300255  |
| H  | 0.506590  | -4.455854 | 3.745151  |
| N  | -1.435222 | -1.657122 | 1.109504  |
| H  | -0.290544 | -0.317632 | 0.013124  |
| N  | -0.886047 | -2.870307 | 1.342755  |
| N  | 0.115036  | -4.260982 | 2.851893  |
| N  | -0.191045 | -2.039073 | 3.381674  |
| C  | -1.254092 | -0.791688 | 0.050014  |
| C  | -2.286895 | -0.309804 | -0.789546 |
| C  | -3.626301 | -0.766024 | -0.731944 |
| N  | -1.902920 | 0.669524  | -1.650152 |
| C  | -4.564224 | -0.201571 | -1.586182 |
| C  | -2.805400 | 1.184056  | -2.461823 |
| C  | -4.155511 | 0.794347  | -2.474934 |
| H  | -3.903652 | -1.530549 | -0.031893 |
| H  | -2.457299 | 1.946366  | -3.135604 |
| H  | -4.845286 | 1.262101  | -3.151598 |
| H  | -5.587920 | -0.525504 | -1.560373 |
| Br | -0.581669 | -6.061987 | 0.278658  |

23

CCNN: 109.90 CNNC: 136.90 E(S0): -3115.28006 E(S1): -3115.27899

|   |           |           |           |
|---|-----------|-----------|-----------|
| C | -0.305173 | -3.074412 | 2.653609  |
| H | -1.108564 | -3.577791 | 0.856852  |
| H | -0.087838 | -5.033141 | 2.211827  |
| H | -0.468121 | -1.185165 | 3.310756  |
| H | 0.293457  | -2.263823 | 4.413472  |
| H | 0.425234  | -4.553668 | 3.802144  |
| N | -1.314367 | -1.525581 | 1.269944  |
| H | -0.228294 | -0.198119 | 0.101280  |
| N | -0.856000 | -2.800090 | 1.461835  |
| N | 0.078872  | -4.301719 | 2.904882  |
| N | -0.133400 | -2.095860 | 3.532546  |
| C | -1.148190 | -0.752658 | 0.143466  |
| C | -2.190485 | -0.400697 | -0.759511 |
| C | -3.500700 | -0.925941 | -0.686560 |
| N | -1.840629 | 0.523492  | -1.687930 |
| C | -4.450706 | -0.484694 | -1.599526 |
| C | -2.751231 | 0.919831  | -2.556404 |
| C | -4.076744 | 0.456064  | -2.559545 |
| H | -3.752701 | -1.641471 | 0.072573  |

|    |           |           |           |
|----|-----------|-----------|-----------|
| H  | -2.429366 | 1.643267  | -3.283938 |
| H  | -4.776525 | 0.829246  | -3.282978 |
| H  | -5.456736 | -0.859344 | -1.561692 |
| Br | -0.646141 | -5.954133 | 0.236670  |

23

CCNN: 106.29 CNNC: 143.53 E(S0): -3115.28615 E(S1): -3115.28179

|    |           |           |           |
|----|-----------|-----------|-----------|
| C  | -0.251051 | -3.120672 | 2.776466  |
| H  | -0.905771 | -3.558070 | 0.909228  |
| H  | -0.038485 | -5.070848 | 2.308515  |
| H  | -0.396684 | -1.241368 | 3.488265  |
| H  | 0.321818  | -2.361133 | 4.568915  |
| H  | 0.323916  | -4.655878 | 3.949838  |
| N  | -1.144760 | -1.508667 | 1.353692  |
| H  | -0.081602 | -0.244473 | 0.076434  |
| N  | -0.712891 | -2.808411 | 1.576111  |
| N  | 0.111770  | -4.366101 | 3.023181  |
| N  | -0.148835 | -2.178115 | 3.713631  |
| C  | -0.976241 | -0.833925 | 0.192573  |
| C  | -2.044968 | -0.573969 | -0.731765 |
| C  | -3.316978 | -1.168377 | -0.625255 |
| N  | -1.736563 | 0.300303  | -1.714515 |
| C  | -4.285296 | -0.844876 | -1.569938 |
| C  | -2.662241 | 0.588736  | -2.611774 |
| C  | -3.957394 | 0.050002  | -2.587047 |
| H  | -3.528172 | -1.849672 | 0.175925  |
| H  | -2.376302 | 1.280506  | -3.383456 |
| H  | -4.671557 | 0.331059  | -3.337758 |
| H  | -5.266908 | -1.277142 | -1.513153 |
| Br | -0.754336 | -5.777430 | 0.176438  |

23

CCNN: 103.41 CNNC: 152.91 E(S0): -3115.28847 E(S1): -3115.28257

|   |           |           |           |
|---|-----------|-----------|-----------|
| C | -0.395462 | -3.184330 | 2.911512  |
| H | -0.793704 | -3.573164 | 0.968391  |
| H | -0.134553 | -5.119394 | 2.427101  |
| H | -0.612768 | -1.327045 | 3.656715  |
| H | 0.046217  | -2.459285 | 4.745725  |
| H | -0.106164 | -4.774785 | 4.109881  |
| N | -1.047115 | -1.528296 | 1.401547  |
| H | 0.030168  | -0.360205 | 0.053639  |
| N | -0.691631 | -2.841034 | 1.680129  |
| N | -0.051187 | -4.442772 | 3.174099  |
| N | -0.437160 | -2.277264 | 3.896225  |
| C | -0.877427 | -0.918711 | 0.224041  |
| C | -1.954143 | -0.683247 | -0.710408 |
| C | -3.221818 | -1.274430 | -0.577869 |
| N | -1.639709 | 0.137313  | -1.732798 |

|    |           |           |           |
|----|-----------|-----------|-----------|
| C  | -4.185026 | -1.007339 | -1.545839 |
| C  | -2.561790 | 0.378514  | -2.649397 |
| C  | -3.853251 | -0.165088 | -2.604948 |
| H  | -3.431353 | -1.919360 | 0.252840  |
| H  | -2.273371 | 1.031622  | -3.452961 |
| H  | -4.562763 | 0.070343  | -3.375605 |
| H  | -5.163068 | -1.445467 | -1.476359 |
| Br | -0.748562 | -5.655815 | 0.115141  |

23

CCNN: 100.11 CNNC: 163.46 E(S0): -3115.28783 E(S1): -3115.28292

|    |           |           |           |
|----|-----------|-----------|-----------|
| C  | -0.753320 | -3.263102 | 3.004844  |
| H  | -0.780551 | -3.590767 | 1.009529  |
| H  | -0.395239 | -5.180719 | 2.515156  |
| H  | -1.055706 | -1.421939 | 3.754229  |
| H  | -0.581186 | -2.582429 | 4.895538  |
| H  | -0.752179 | -4.904907 | 4.164638  |
| N  | -1.089602 | -1.555148 | 1.449135  |
| H  | 0.034255  | -0.473012 | 0.066207  |
| N  | -0.838338 | -2.884179 | 1.756577  |
| N  | -0.455040 | -4.535035 | 3.289973  |
| N  | -0.965929 | -2.383210 | 3.999992  |
| C  | -0.897508 | -0.981166 | 0.263551  |
| C  | -1.958121 | -0.733236 | -0.690292 |
| C  | -3.252330 | -1.257016 | -0.541580 |
| N  | -1.597606 | 0.023606  | -1.744345 |
| C  | -4.194649 | -0.991337 | -1.529916 |
| C  | -2.500932 | 0.265233  | -2.680345 |
| C  | -3.815454 | -0.215817 | -2.623590 |
| H  | -3.495922 | -1.850700 | 0.317445  |
| H  | -2.175959 | 0.866499  | -3.509680 |
| H  | -4.507853 | 0.014535  | -3.411190 |
| H  | -5.192659 | -1.379176 | -1.451118 |
| Br | -0.597112 | -5.592681 | 0.074288  |

23

CCNN: 97.87 CNNC: 176.99 E(S0): -3115.28710 E(S1): -3115.28305

|   |           |           |           |
|---|-----------|-----------|-----------|
| C | -1.062802 | -3.305248 | 2.983274  |
| H | -0.739527 | -3.632552 | 1.016667  |
| H | -0.624996 | -5.218828 | 2.563453  |
| H | -1.486365 | -1.468766 | 3.682651  |
| H | -1.148831 | -2.620044 | 4.869916  |
| H | -1.328106 | -4.955085 | 4.088501  |
| N | -1.052700 | -1.589165 | 1.402551  |
| H | 0.066562  | -0.632703 | -0.062431 |
| N | -0.932331 | -2.926382 | 1.744528  |
| N | -0.814212 | -4.580616 | 3.321911  |
| N | -1.441267 | -2.430990 | 3.937271  |

|    |           |           |           |
|----|-----------|-----------|-----------|
| C  | -0.888576 | -1.063881 | 0.196689  |
| C  | -1.982122 | -0.757470 | -0.705161 |
| C  | -3.298006 | -1.191643 | -0.480337 |
| N  | -1.628577 | -0.044643 | -1.790696 |
| C  | -4.271827 | -0.880771 | -1.424701 |
| C  | -2.561305 | 0.242102  | -2.683996 |
| C  | -3.899988 | -0.150209 | -2.551154 |
| H  | -3.536472 | -1.753154 | 0.401730  |
| H  | -2.241347 | 0.807482  | -3.540125 |
| H  | -4.615295 | 0.112861  | -3.307380 |
| H  | -5.287738 | -1.200928 | -1.286918 |
| Br | -0.434508 | -5.582500 | 0.072696  |

23

CCNN: 94.13 CNNC: 190.35 E(S0): -3115.28489 E(S1): -3115.28395

|    |           |           |           |
|----|-----------|-----------|-----------|
| C  | -1.353976 | -3.311902 | 2.871146  |
| H  | -0.729004 | -3.644846 | 0.979257  |
| H  | -0.888260 | -5.231562 | 2.516083  |
| H  | -1.799099 | -1.464786 | 3.525123  |
| H  | -1.742964 | -2.648568 | 4.725683  |
| H  | -1.780872 | -4.953286 | 3.939417  |
| N  | -1.038374 | -1.595013 | 1.322013  |
| H  | 0.033235  | -0.727179 | -0.232585 |
| N  | -1.037659 | -2.937099 | 1.663368  |
| N  | -1.173714 | -4.587820 | 3.239353  |
| N  | -1.853798 | -2.431448 | 3.760121  |
| C  | -0.926649 | -1.093998 | 0.096200  |
| C  | -2.057168 | -0.740505 | -0.739269 |
| C  | -3.375081 | -1.110097 | -0.427246 |
| N  | -1.739868 | -0.057501 | -1.854922 |
| C  | -4.390941 | -0.765906 | -1.313793 |
| C  | -2.712703 | 0.262592  | -2.692455 |
| C  | -4.057314 | -0.066424 | -2.471758 |
| H  | -3.584060 | -1.649291 | 0.476088  |
| H  | -2.421367 | 0.803379  | -3.574487 |
| H  | -4.805713 | 0.220301  | -3.186146 |
| H  | -5.409887 | -1.037402 | -1.108767 |
| Br | -0.247123 | -5.604528 | 0.113576  |

23

CCNN: 92.49 CNNC: 198.54 E(S0): -3115.28409 E(S1): -3115.28409

|   |           |           |          |
|---|-----------|-----------|----------|
| C | -1.534444 | -3.318416 | 2.748480 |
| H | -0.698144 | -3.642522 | 0.936824 |
| H | -1.026208 | -5.237504 | 2.443092 |
| H | -2.040830 | -1.469640 | 3.350803 |
| H | -2.108531 | -2.651557 | 4.555300 |
| H | -2.034980 | -4.956988 | 3.795427 |
| N | -1.055745 | -1.596166 | 1.249276 |

|    |           |           |           |
|----|-----------|-----------|-----------|
| H  | -0.025329 | -0.749759 | -0.343138 |
| N  | -1.105033 | -2.941816 | 1.573517  |
| N  | -1.393773 | -4.591659 | 3.126756  |
| N  | -2.116473 | -2.436266 | 3.583049  |
| C  | -0.980324 | -1.093622 | 0.020092  |
| C  | -2.135355 | -0.711274 | -0.767612 |
| C  | -3.450456 | -1.030873 | -0.393250 |
| N  | -1.846630 | -0.054309 | -1.906583 |
| C  | -4.493205 | -0.662793 | -1.238214 |
| C  | -2.844834 | 0.288637  | -2.704461 |
| C  | -4.188882 | 0.009971  | -2.420142 |
| H  | -3.637919 | -1.549843 | 0.525602  |
| H  | -2.574933 | 0.807847  | -3.605954 |
| H  | -4.958499 | 0.313761  | -3.104484 |
| H  | -5.510742 | -0.895510 | -0.983559 |
| Br | -0.112847 | -5.631911 | 0.163269  |

Geometries from  $\text{MECl}_2$  to  $E_2$  on the  $S_0$  surface.

23

CCNN: 92.49 CNNC: 198.54 E(S0): -3115.28409 E(S1): -3115.28409

|    |           |           |           |
|----|-----------|-----------|-----------|
| C  | -1.534444 | -3.318416 | 2.748480  |
| H  | -0.698144 | -3.642522 | 0.936824  |
| H  | -1.026208 | -5.237504 | 2.443092  |
| H  | -2.040830 | -1.469640 | 3.350803  |
| H  | -2.108531 | -2.651557 | 4.555300  |
| H  | -2.034980 | -4.956988 | 3.795427  |
| N  | -1.055745 | -1.596166 | 1.249276  |
| H  | -0.025329 | -0.749759 | -0.343138 |
| N  | -1.105033 | -2.941816 | 1.573517  |
| N  | -1.393773 | -4.591659 | 3.126756  |
| N  | -2.116473 | -2.436266 | 3.583049  |
| C  | -0.980324 | -1.093622 | 0.020092  |
| C  | -2.135355 | -0.711274 | -0.767612 |
| C  | -3.450456 | -1.030873 | -0.393250 |
| N  | -1.846630 | -0.054309 | -1.906583 |
| C  | -4.493205 | -0.662793 | -1.238214 |
| C  | -2.844834 | 0.288637  | -2.704461 |
| C  | -4.188882 | 0.009971  | -2.420142 |
| H  | -3.637919 | -1.549843 | 0.525602  |
| H  | -2.574933 | 0.807847  | -3.605954 |
| H  | -4.958499 | 0.313761  | -3.104484 |
| H  | -5.510742 | -0.895510 | -0.983559 |
| Br | -0.112847 | -5.631911 | 0.163269  |

23

CCNN: 120.64 CNNC: 195.53 E(S0): -3115.33093 E(S1): -3115.23501

|   |           |           |          |
|---|-----------|-----------|----------|
| C | -1.545536 | -3.402099 | 2.762602 |
|---|-----------|-----------|----------|

|    |           |           |           |
|----|-----------|-----------|-----------|
| H  | -0.502204 | -3.574303 | 1.044580  |
| H  | -0.634624 | -5.168596 | 2.531099  |
| H  | -2.491474 | -1.706303 | 3.246007  |
| H  | -2.419025 | -2.856644 | 4.484674  |
| H  | -1.769733 | -5.098999 | 3.805561  |
| N  | -1.347758 | -1.647385 | 1.241860  |
| H  | -0.204624 | -1.182578 | -0.453948 |
| N  | -1.097209 | -2.962365 | 1.608086  |
| N  | -1.170627 | -4.607038 | 3.180599  |
| N  | -2.374217 | -2.659510 | 3.510031  |
| C  | -1.183963 | -1.279131 | -0.012980 |
| C  | -2.279908 | -0.729049 | -0.796353 |
| C  | -3.615798 | -0.765574 | -0.371956 |
| N  | -1.913179 | -0.237809 | -1.991741 |
| C  | -4.599340 | -0.283373 | -1.230773 |
| C  | -2.856000 | 0.215602  | -2.803321 |
| C  | -4.216418 | 0.216515  | -2.473873 |
| H  | -3.864224 | -1.170667 | 0.588702  |
| H  | -2.523098 | 0.594396  | -3.752377 |
| H  | -4.939444 | 0.594235  | -3.171843 |
| H  | -5.633783 | -0.304970 | -0.941911 |
| Br | -0.048261 | -5.638941 | 0.183182  |

23

CCNN: 146.66 CNNC: 189.95 E(S0): -3115.37782 E(S1): -3115.20176

|   |           |           |           |
|---|-----------|-----------|-----------|
| C | -1.601816 | -3.534974 | 2.806775  |
| H | -0.585381 | -3.576491 | 1.070525  |
| H | -0.419897 | -5.131718 | 2.588381  |
| H | -2.843249 | -2.030409 | 3.259656  |
| H | -2.545007 | -3.113054 | 4.528865  |
| H | -1.500687 | -5.211374 | 3.901821  |
| N | -1.789732 | -1.825268 | 1.209480  |
| H | -0.592098 | -1.702152 | -0.482788 |
| N | -1.258686 | -3.057542 | 1.634296  |
| N | -1.010326 | -4.642041 | 3.248557  |
| N | -2.541087 | -2.934077 | 3.549989  |
| C | -1.556646 | -1.537655 | -0.028316 |
| C | -2.516012 | -0.781047 | -0.845447 |
| C | -3.835402 | -0.543051 | -0.445954 |
| N | -2.040691 | -0.410158 | -2.039364 |
| C | -4.692183 | 0.096368  | -1.338807 |
| C | -2.861584 | 0.200885  | -2.886008 |
| C | -4.198288 | 0.476190  | -2.587168 |
| H | -4.174030 | -0.871455 | 0.516711  |
| H | -2.442445 | 0.478328  | -3.835537 |
| H | -4.822938 | 0.964388  | -3.311204 |
| H | -5.716472 | 0.281300  | -1.073866 |

Br 0.059115 -5.621244 0.208730

23

CCNN: 168.01 CNNC: 184.69 E(S0): -3115.39838 E(S1): -3115.21683

C -1.804359 -3.693445 2.773546  
H -0.843338 -3.722799 1.012521  
H -0.460911 -5.165119 2.593881  
H -3.224115 -2.338295 3.179439  
H -2.793180 -3.330302 4.488149  
H -1.490200 -5.289944 3.943575  
N -2.229222 -2.142974 1.091088  
H -1.039562 -2.204676 -0.616720  
N -1.532736 -3.222134 1.579210  
N -1.082128 -4.705755 3.247987  
N -2.800925 -3.178982 3.504791  
C -1.930518 -1.838276 -0.134930  
C -2.756216 -0.875290 -0.929859  
C -4.022439 -0.450780 -0.534576  
N -2.196373 -0.518550 -2.091234  
C -4.734736 0.372318 -1.394846  
C -2.885480 0.275853 -2.899237  
C -4.163594 0.742312 -2.592414  
H -4.436923 -0.777559 0.398852  
H -2.408728 0.544816 -3.823681  
H -4.686575 1.371319 -3.288238  
H -5.722472 0.705352 -1.133716  
Br 0.227282 -5.574068 0.257224

23

CCNN: 179.68 CNNC: 182.73 E(S0): -3115.40299 E(S1): -3115.22124

C -1.971684 -3.802363 2.653184  
H -1.057310 -3.884981 0.867333  
H -0.515197 -5.181232 2.548474  
H -3.485209 -2.529118 2.994997  
H -3.004460 -3.444036 4.353212  
H -1.481313 -5.241255 3.970202  
N -2.551533 -2.401270 0.897094  
H -1.473193 -2.545321 -0.880289  
N -1.741788 -3.372522 1.430408  
N -1.184697 -4.736720 3.166247  
N -2.981785 -3.301314 3.369478  
C -2.277734 -2.086321 -0.330437  
C -3.077249 -1.046251 -1.056459  
C -4.234694 -0.471456 -0.535033  
N -2.582088 -0.725884 -2.255780  
C -4.896081 0.478468 -1.296851  
C -3.224530 0.188084 -2.974393  
C -4.388721 0.818071 -2.532857



|    |           |           |           |
|----|-----------|-----------|-----------|
| H  | -4.600019 | -0.766181 | 0.427890  |
| H  | -2.801248 | 0.423889  | -3.932554 |
| H  | -4.874295 | 1.548880  | -3.153602 |
| H  | -5.794971 | 0.940543  | -0.928160 |
| Br | 0.452428  | -5.496450 | 0.326878  |

Geometries from  $\text{MECl}_2$  to  $\text{Z}_2$  on the  $\text{S}_0$  surface.

23

CCNN: 92.49 CNNC: 198.54 E(S0): -3115.28409 E(S1): -3115.28409

|    |           |           |           |
|----|-----------|-----------|-----------|
| C  | -1.534444 | -3.318416 | 2.748480  |
| H  | -0.698144 | -3.642522 | 0.936824  |
| H  | -1.026208 | -5.237504 | 2.443092  |
| H  | -2.040830 | -1.469640 | 3.350803  |
| H  | -2.108531 | -2.651557 | 4.555300  |
| H  | -2.034980 | -4.956988 | 3.795427  |
| N  | -1.055745 | -1.596166 | 1.249276  |
| H  | -0.025329 | -0.749759 | -0.343138 |
| N  | -1.105033 | -2.941816 | 1.573517  |
| N  | -1.393773 | -4.591659 | 3.126756  |
| N  | -2.116473 | -2.436266 | 3.583049  |
| C  | -0.980324 | -1.093622 | 0.020092  |
| C  | -2.135355 | -0.711274 | -0.767612 |
| C  | -3.450456 | -1.030873 | -0.393250 |
| N  | -1.846630 | -0.054309 | -1.906583 |
| C  | -4.493205 | -0.662793 | -1.238214 |
| C  | -2.844834 | 0.288637  | -2.704461 |
| C  | -4.188882 | 0.009971  | -2.420142 |
| H  | -3.637919 | -1.549843 | 0.525602  |
| H  | -2.574933 | 0.807847  | -3.605954 |
| H  | -4.958499 | 0.313761  | -3.104484 |
| H  | -5.510742 | -0.895510 | -0.983559 |
| Br | -0.112847 | -5.631911 | 0.163269  |

23

CCNN: 56.17 CNNC: 198.13 E(S0): -3115.34848 E(S1): -3115.22138

|   |           |           |           |
|---|-----------|-----------|-----------|
| C | -1.385932 | -3.205814 | 2.790181  |
| H | -1.036031 | -3.457420 | 0.812111  |
| H | -1.427452 | -5.148853 | 2.262910  |
| H | -1.224102 | -1.386385 | 3.607187  |
| H | -1.363351 | -2.652269 | 4.716352  |
| H | -2.063379 | -4.789493 | 3.817052  |
| N | -0.721275 | -1.440722 | 1.398340  |
| H | 0.033369  | -0.297312 | -0.055064 |
| N | -1.121953 | -2.783698 | 1.574994  |
| N | -1.515238 | -4.504155 | 3.036505  |
| N | -1.522692 | -2.320804 | 3.790825  |
| C | -0.804236 | -0.917348 | 0.207512  |

|    |           |           |           |
|----|-----------|-----------|-----------|
| C  | -1.970708 | -0.803374 | -0.679900 |
| C  | -3.214416 | -1.404044 | -0.437296 |
| N  | -1.748461 | -0.023448 | -1.747417 |
| C  | -4.253185 | -1.175863 | -1.335646 |
| C  | -2.740871 | 0.182550  | -2.602929 |
| C  | -4.015849 | -0.366621 | -2.444110 |
| H  | -3.368064 | -2.011236 | 0.432522  |
| H  | -2.518210 | 0.813626  | -3.443809 |
| H  | -4.786343 | -0.161201 | -3.163142 |
| H  | -5.219683 | -1.614973 | -1.172052 |
| Br | -0.284474 | -5.572893 | 0.121269  |

23

CCNN: 25.91 CNNC: 201.45 E(S0): -3115.38713 E(S1): -3115.20800

|    |           |           |           |
|----|-----------|-----------|-----------|
| C  | -0.952387 | -3.081239 | 2.906371  |
| H  | -0.888724 | -3.372031 | 0.912554  |
| H  | -1.211614 | -5.014306 | 2.400494  |
| H  | -0.517457 | -1.288307 | 3.678493  |
| H  | -0.618900 | -2.542048 | 4.811710  |
| H  | -1.582003 | -4.619916 | 4.037909  |
| N  | -0.304107 | -1.381981 | 1.427764  |
| H  | 0.053650  | 0.040642  | 0.121819  |
| N  | -0.848618 | -2.675544 | 1.658673  |
| N  | -1.164679 | -4.361904 | 3.172283  |
| N  | -0.858457 | -2.196816 | 3.909437  |
| C  | -0.573425 | -0.810222 | 0.312374  |
| C  | -1.692845 | -0.922136 | -0.654226 |
| C  | -2.776944 | -1.803965 | -0.579852 |
| N  | -1.606348 | 0.023370  | -1.602079 |
| C  | -3.805070 | -1.675064 | -1.514581 |
| C  | -2.579161 | 0.129197  | -2.496929 |
| C  | -3.708495 | -0.692772 | -2.494806 |
| H  | -2.840344 | -2.553187 | 0.179985  |
| H  | -2.461239 | 0.900460  | -3.235940 |
| H  | -4.476455 | -0.559477 | -3.233358 |
| H  | -4.657166 | -2.326785 | -1.470117 |
| Br | -0.644181 | -5.513086 | 0.081072  |

23

CCNN: 7.31 CNNC: 189.68 E(S0): -3115.39553 E(S1): -3115.21561

|   |           |           |          |
|---|-----------|-----------|----------|
| C | -0.416228 | -3.047239 | 2.958908 |
| H | -0.800270 | -3.209918 | 0.979545 |
| H | -0.767993 | -4.942746 | 2.369489 |
| H | 0.150773  | -1.289860 | 3.716747 |
| H | 0.320755  | -2.611068 | 4.781877 |
| H | -0.563730 | -4.711717 | 4.078812 |
| N | -0.216916 | -1.230493 | 1.525941 |
| H | -0.118752 | 0.353588  | 0.366255 |

|    |           |           |           |
|----|-----------|-----------|-----------|
| N  | -0.667929 | -2.540728 | 1.753637  |
| N  | -0.552523 | -4.337187 | 3.157580  |
| N  | -0.079628 | -2.230281 | 3.955049  |
| C  | -0.581156 | -0.610222 | 0.465864  |
| C  | -1.541906 | -0.898214 | -0.625935 |
| C  | -2.501138 | -1.915075 | -0.648592 |
| N  | -1.443643 | 0.013665  | -1.607294 |
| C  | -3.375657 | -1.982872 | -1.734715 |
| C  | -2.271561 | -0.062691 | -2.639276 |
| C  | -3.260950 | -1.043600 | -2.752711 |
| H  | -2.586902 | -2.635902 | 0.135179  |
| H  | -2.148575 | 0.685365  | -3.401215 |
| H  | -3.911813 | -1.059466 | -3.606582 |
| H  | -4.118377 | -2.756925 | -1.774509 |
| Br | -1.035673 | -5.455125 | 0.117820  |

23

CCNN: 0.34 CNNC: 180.36 E(S0): -3115.39695 E(S1): -3115.21543

|    |           |           |           |
|----|-----------|-----------|-----------|
| C  | -0.159305 | -3.037706 | 2.929648  |
| H  | -0.785818 | -3.085868 | 1.008897  |
| H  | -0.564219 | -4.907447 | 2.283591  |
| H  | 0.435636  | -1.300656 | 3.739092  |
| H  | 0.688508  | -2.678668 | 4.733899  |
| H  | 0.079615  | -4.789798 | 3.891048  |
| N  | -0.319862 | -1.092100 | 1.665747  |
| H  | -0.406404 | 0.552269  | 0.597564  |
| N  | -0.610122 | -2.466647 | 1.812963  |
| N  | -0.239700 | -4.340479 | 3.063938  |
| N  | 0.314405  | -2.274124 | 3.907403  |
| C  | -0.725062 | -0.473295 | 0.624641  |
| C  | -1.501670 | -0.890546 | -0.569504 |
| C  | -2.457565 | -1.905491 | -0.600873 |
| N  | -1.217171 | -0.130871 | -1.637346 |
| C  | -3.111023 | -2.167404 | -1.806527 |
| C  | -1.840633 | -0.384926 | -2.779510 |
| C  | -2.793882 | -1.398288 | -2.920076 |
| H  | -2.695308 | -2.484626 | 0.265952  |
| H  | -1.577418 | 0.241151  | -3.612047 |
| H  | -3.265636 | -1.567104 | -3.869554 |
| H  | -3.831859 | -2.960369 | -1.862513 |
| Br | -1.257133 | -5.388257 | 0.145743  |
